# Supplementary material for: Global machine-learning detection of submarine calderas
Source: Research Square preprint supplement (doi:10.21203/rs.3.rs-7313707/v1), 2025-08-19
Supplement: Supplementary file 1 [file 741af89a8cf4630d2fa9fcf6.xlsx]

## Sheet: Calderas-craters
ID	Long	Lat	Feature Diameter_km	Caldera_Diamater_km	Type	Sub_Type	Tectonic_setting	Stage	Multibeam	positive/negative	duplicates	ring_mean	centre_mea	inner_mean	outer_mean	ring_std	centre_std	inner_std	outer_std	ridge	peak
SCD-0074	-141.555	29.949	4.76315	1.1	crater/small caldera	full crater/small caldera	intraplate	1	y	n	2	-4710.31	-4618.52	-4577	-4816.19	54.1346	24.4176	30.7205	63.2813	TRUE	FALSE
SCD-0076	-110.954	19.2536	4.32397	1.4	crater/small caldera	full crater/small caldera	divergent	1	y	n	2	-2364.64	-2365.47	-2313.78	-2433.8	82.7699	27.1011	33.5315	157.129	TRUE	FALSE
SCD-0075	-119.629	13.6775	6.91445	1.5	crater/small caldera	horse-shoe/eroded crater/small caldera	intraplate	1	n	n	2	-4172.84	-4079.72	-4021.23	-4243.22	62.971	51.5923	49.1906	75.6289	TRUE	FALSE
SCD-0073	-164.641	21.3941	4.32522	1.5	crater/small caldera	horse-shoe/eroded crater/small caldera	intraplate	1	y	n	2	-4465.39	-4330.06	-4326.75	-4687.11	194.278	43.3596	149.382	91.7825	TRUE	FALSE
SCD-0066	-135.168	29.3141	4.32979	1.72	crater/small caldera	full crater/small caldera	intraplate	1	y	n	4	-4329.36	-4228.95	-4181.14	-4410.48	80.3923	30.099	61.6527	80.5021	TRUE	FALSE
SCD-0057	-166.156	1.00899	5.33799	1.78	crater/small caldera	horse-shoe/eroded crater/small caldera	intraplate	1	y	n	5	-4960.89	-4758.59	-4746.45	-5138.06	129.837	1.49707	90.409	186.46	TRUE	FALSE
SCD-0068	-142.547	-26.2855	4.32785	1.8	crater/small caldera	horse-shoe/eroded crater/small caldera	intraplate	1	n	n	3	-3889.39	-3752.2	-3745.36	-3953.36	67.7847	34.172	71.8528	68.0915	TRUE	FALSE
SCD-0058	-140.194	49.1173	4.34408	1.86	crater/small caldera	full crater/small caldera	intraplate	1	y	n	4	-3951.95	-3898.88	-3880.5	-3985.28	36.7515	46.6943	35.2947	33.8464	TRUE	FALSE
SCD-0065	-133.301	49.3642	5.53097	1.9	crater/small caldera	full crater/small caldera	intraplate	1	y	n	6	-2989.81	-2869.06	-2799.78	-3198.66	97.1191	43.2337	66.8535	96.0166	TRUE	FALSE
SCD-0067	-132.789	27.445	4.32852	2	crater/small caldera	horse-shoe/eroded crater/small caldera	intraplate	1	y	n	4	-4425.58	-4304	-4302.12	-4481.64	87.2906	56.5332	66.7784	70.172	TRUE	FALSE
SCD-0060	-103.434	13.0979	6.7969	2.15	crater/small caldera	full crater/small caldera	divergent	1	y	n	13	-2791.52	-2651.44	-2627.56	-2867.31	193.265	24.662	92.739	307.778	TRUE	FALSE
SCD-0064	-108.755	23.0415	8.30089	2.3	crater/small caldera	horse-shoe/eroded crater/small caldera	divergent	2	y	n	6	-2337.84	-2024.62	-2016.53	-2574.88	265.023	47.6168	114.787	326.142	TRUE	FALSE
SCD-0069	-174.053	-9.38052	6.74796	2.4	crater/small caldera	full crater/small caldera	intraplate	1	y	n	3	-4145.81	-4119.86	-4058.3	-4189.88	89.3305	37.6675	80.3953	89.0189	TRUE	FALSE
SCD-0078	-131.043	41.3045	4.33837	2.4	crater/small caldera	full crater/small caldera	intraplate	2	y	p	2	-1900.27	-1936.38	-1826.72	-2137.91	119.291	24.114	88.318	118.221	TRUE	FALSE
SCD-0070	-118.5	13.106	4.60957	2.5	crater/small caldera	full crater/small caldera	intraplate	1	n	n	3	-3772.7	-3669.42	-3629.97	-3966.16	93.8347	5.52496	53.2221	100.705	TRUE	FALSE
SCD-0071	163.733	18.1515	4.61167	2.5	crater/small caldera	horse-shoe/eroded crater/small caldera	intraplate	1	n	n	3	-5119.03	-5061.97	-5047.91	-5165.62	42.4544	11.2402	63.5019	27.3847	TRUE	FALSE
SCD-0063	-90.5669	8.29715	5.27026	2.6	crater/small caldera	horse-shoe/eroded crater/small caldera	intraplate	1	y	n	6	-3373.53	-3330.25	-3317.58	-3393.78	30.4897	8.92503	42.2514	23.8232	TRUE	FALSE
SCD-0062	-141.085	50.2894	5.36257	2.6	crater/small caldera	full crater/small caldera	intraplate	1	y	n	7	-3841.27	-3745.5	-3723.2	-3888.83	71.1054	11.718	27.5024	129.238	TRUE	FALSE
SCD-0072	-161.95	24.7126	4.32687	2.6	crater/small caldera	horse-shoe/eroded crater/small caldera	intraplate	1	y	n	2	-4960.23	-4932	-4921.22	-4970.98	13.6871	3.87298	24.357	18.4395	TRUE	FALSE
SCD-0061	-135.449	51.4255	6.73421	2.7	crater/small caldera	full crater/small caldera	intraplate	1	y	n	12	-3403.5	-3215.97	-3186.98	-3507.95	165.116	32.8162	116.983	149.056	TRUE	FALSE
SCD-0077	-141.137	53.7278	4.34761	2.7	crater/small caldera	horse-shoe/eroded crater/small caldera	intraplate	1	y	n	2	-3728.95	-3711.56	-3688.78	-3745.23	14.4627	17.5694	21.7948	24.0389	TRUE	FALSE
SCD-0018	-168	0.366979	8.74997	2.7	caldera	full caldera	intraplate	1	y	n	9	-4972.91	-4764.2	-4703.33	-5112.73	142.373	128.711	143.544	183.794	TRUE	FALSE
SCD-0035	-95.7617	5.48104	4.60762	2.9	caldera	horse-shoe/eroded caldera	intraplate	1	y	n	3	-3595.09	-3530.44	-3530.27	-3653.94	69.7952	12.2779	74.8589	39.1108	TRUE	FALSE
SCD-0042	-138.264	32.149	6.00202	3	caldera	horse-shoe/eroded caldera	intraplate	1	y	n	2	-4544.55	-4457.64	-4404.53	-4628.64	67.2453	45.2532	70.859	112.411	TRUE	FALSE
SCD-0059	-156.138	-25.1748	5.81074	3	crater/small caldera	horse-shoe/eroded crater/small caldera	intraplate	1	n	n	4	-4742.78	-4649.12	-4644.91	-4813.19	76.875	46.7037	78.3425	67.8141	TRUE	FALSE
SCD-0044	-28.2555	-8.91588	4.75234	3.4	caldera	horse-shoe/eroded caldera	intraplate	1	n	n	2	-5509.33	-5526.19	-5492.81	-5555.11	48.4523	2.99413	50.9319	43.3006	TRUE	FALSE
SCD-0003	-132.158	42.3568	4.55607	3.5	caldera	horse-shoe/eroded caldera	intraplate	1	y	n	4	-3501.22	-3395.16	-3363.67	-3568.3	147.27	44.4256	103.769	192.462	TRUE	FALSE
SCD-0032	-173.611	-10.1621	7.34787	3.5	caldera	horse-shoe/eroded caldera	intraplate	1	y	n	4	-3999	-3947.02	-3945.8	-4018.67	64.4874	17.1159	54.9099	90.9404	TRUE	FALSE
SCD-0040	-144.129	50.4556	5.30085	3.5	caldera	horse-shoe/eroded caldera	intraplate	1	y	n	3	-4042.92	-3998.44	-3965.94	-4068.48	31.3036	46.2952	51.4681	11.3729	TRUE	FALSE
SCD-0033	-170.773	-11.4042	5.03361	3.5	caldera	horse-shoe/eroded caldera	intraplate	1	y	n	4	-4840.61	-4808.88	-4742.94	-4916.36	76.8254	43.8333	118.894	40.1899	TRUE	FALSE
SCD-0002	-98.4517	10.6053	7.85072	3.5	caldera	full caldera	intraplate	2	y	n	4	-2853.3	-2579.33	-2468.69	-3199.92	153.506	23.7178	113.935	184.745	TRUE	FALSE
SCD-0049	-90.0139	1.78475	5.44125	3.6	caldera	full caldera	divergent	3	y	p	2	-991.828	-1035.53	-882.125	-1137.66	187.093	11.9634	124.692	207.849	TRUE	FALSE
SCD-0004	-150.383	54.8653	4.34852	3.8	caldera	full caldera	intraplate	1	n	n	4	-3886.23	-3802.94	-3776.31	-3892.3	94.4025	5.32645	67.3591	134.95	TRUE	FALSE
SCD-0031	-139.09	-28.6823	7.57602	3.9	caldera	horse-shoe/eroded caldera	intraplate	1	n	n	4	-3541.11	-3402.36	-3379.03	-3685.94	154.688	61.5646	76.4975	231.012	TRUE	FALSE
SCD-0024	-105.784	9.23606	6.69552	4	caldera	horse-shoe/eroded caldera	divergent	1	n	n	6	-3220.61	-3130.53	-3088.98	-3310.03	53.7362	29.4486	103.243	34.6901	TRUE	FALSE
SCD-0005	-89.6641	9.64653	6.72195	4	caldera	horse-shoe/eroded caldera	intraplate	1	y	n	4	-3438.22	-3378.92	-3327.44	-3510.95	89.3886	19.3377	160.237	49.4133	TRUE	FALSE
SCD-0037	-137.036	52.5796	4.34676	4	caldera	horse-shoe/eroded caldera	intraplate	1	y	n	3	-3494.95	-3457.08	-3373.14	-3515.73	21.7338	37.2988	71.3635	8.66069	TRUE	FALSE
SCD-0036	-136.54	-9.73785	9.66527	4	caldera	horse-shoe/eroded caldera	intraplate	1	n	n	3	-4211.69	-4147.09	-4076.72	-4271.08	87.7217	85.2829	105.416	55.3611	TRUE	FALSE
SCD-0022	-161.276	25.3025	5.46399	4	caldera	horse-shoe/eroded caldera	intraplate	1	y	n	7	-4893.75	-4940.67	-4868.45	-4950.67	78.7355	22.4855	43.0933	49.9146	TRUE	FALSE
SCD-0048	-176.597	-15.102	5.44496	4	caldera	full caldera	volcanic arc	3	n	p	3	-305	-862.516	-254.625	-481.891	113.484	8.5385	151.068	133.579	TRUE	FALSE
SCD-0051	-149.179	28.3084	4.32915	4.2	caldera	full caldera	intraplate	2	y	p	2	-4353.75	-4537	-4355.61	-4544.95	182.225	0	95.5636	254.529	TRUE	FALSE
SCD-0045	143.547	12.7175	9.60128	4.3	caldera	full caldera	volcanic arc	1	y	n	2	-2965.16	-2713.83	-2710.48	-3179.97	189.021	119.09	128.456	187.682	TRUE	FALSE
SCD-0021	-134.839	39.5137	10.7475	4.5	caldera	horse-shoe/eroded caldera	intraplate	1	y	n	8	-4625.02	-4372.84	-4366.61	-4791.45	226.568	26.6583	156.5	277.288	TRUE	FALSE
SCD-0038	176.262	26.3582	7.08569	4.5	caldera	horse-shoe/eroded caldera	intraplate	1	y	n	3	-5573.44	-5585.16	-5505.56	-5723.2	138.277	25.2971	148.616	135.735	TRUE	FALSE
SCD-0054	-173.903	-16.2184	5.99007	4.7	caldera	horse-shoe/eroded caldera	volcanic arc	3	n	p	2	-521.531	-654.234	-476.969	-654.375	115.674	13.9169	102.516	110.784	TRUE	FALSE
SCD-0010	-172.637	-9.90567	5.80195	4.9	caldera	horse-shoe/eroded caldera	intraplate	1	y	n	4	-3739.11	-3794	-3754.72	-3768.77	45.3921	0	30.6459	51.0676	TRUE	FALSE
SCD-0029	161.013	23.2558	7.95602	4.9	caldera	horse-shoe/eroded caldera	intraplate	1	y	n	5	-5280.48	-5150.84	-5087.73	-5371.77	128.76	12.0652	83.3427	147.493	TRUE	FALSE
SCD-0025	-130.392	45.3416	8.06902	5	caldera	horse-shoe/eroded caldera	divergent	1	y	n	6	-2375.86	-2223.58	-2121.16	-2440.23	100.765	36.3936	151.551	157.374	TRUE	FALSE
SCD-0052	163.399	-2.88345	6.52963	5	caldera	horse-shoe/eroded caldera	intraplate	1	n	p	2	-3601.72	-3840.47	-3650.53	-3658.25	83.2133	6.86014	61.3591	105.353	TRUE	FALSE
SCD-0001	-174.97	-18.7252	7.87443	5	caldera	horse-shoe/eroded caldera	volcanic arc	1	y	n	6	-1604.47	-1426.38	-1417.02	-1680.27	72.6819	10.8779	87.5204	98.2087	TRUE	FALSE
SCD-0026	-85.4479	-2.27707	12.0736	5	caldera	full caldera	intraplate	2	n	n	6	-2702.58	-2354.81	-2224.77	-2864.16	165.713	295.573	245.535	131.977	TRUE	FALSE
SCD-0009	-143.815	-7.19016	5.09698	5	caldera	horse-shoe/eroded caldera	intraplate	2	y	p	4	-3428.8	-3542.27	-3441.92	-3508.66	246.13	13.8612	149.353	294.935	TRUE	FALSE
SCD-0053	-157.573	-15.7066	5.44537	5	caldera	horse-shoe/eroded caldera	intraplate	2	n	p	2	-3755.11	-3791.89	-3765.02	-3898.95	249.926	5.42597	129.211	314.999	TRUE	FALSE
SCD-0023	-169.071	25.9789	5.8562	5.2	caldera	horse-shoe/eroded caldera	intraplate	1	y	n	6	-4044.12	-3951.92	-3931.02	-4102.67	126.714	30.3157	111.28	94.2488	TRUE	FALSE
SCD-0015	-95.9786	8.23839	9.67507	5.5	caldera	horse-shoe/eroded caldera	intraplate	1	n	n	12	-3648.59	-3785.42	-3438.92	-3737.42	62.3605	64.6125	180.127	42.7028	TRUE	FALSE
SCD-0017	-138.49	-29.037	6.89719	5.5	caldera	horse-shoe/eroded caldera	intraplate	1	n	n	9	-4063.55	-3858.39	-3846.86	-4144.81	147.454	24.0011	94.6445	188.039	TRUE	FALSE
SCD-0016	-136.362	34.9903	8.30245	5.5	caldera	horse-shoe/eroded caldera	intraplate	2	y	n	10	-3777.81	-3321.41	-3317.39	-4042.92	160.508	26.9489	220.301	184.933	TRUE	FALSE
SCD-0007	-175.642	-15.604	8.04882	5.5	caldera	full caldera	volcanic arc	4	n	p	9	-96.9062	13.2344	66.6719	-466.734	153.546	5.07365	35.3863	127.619	TRUE	FALSE
SCD-0047	125.55	16.838	5.6478	5.8	caldera	horse-shoe/eroded caldera	intraplate	1	n	p	3	-2546.55	-2599.2	-2586.75	-2597.45	70.504	5.28908	39.8195	140.863	TRUE	FALSE
SCD-0046	118.721	13.3499	8.64316	6	caldera	horse-shoe/eroded caldera	intraplate	1	y	n	2	-3325.72	-3173.22	-3126.58	-3380.12	88.7577	58.0071	155.841	66.7	TRUE	FALSE
SCD-0050	-90.9276	3.07303	6.52963	6	caldera	horse-shoe/eroded caldera	divergent	2	n	p	2	-1525.64	-1852.97	-1540.64	-1593.45	200.121	20.9702	211.377	211.956	TRUE	FALSE
SCD-0056	175.049	-8.56833	6.48031	6	caldera	horse-shoe/eroded caldera	intraplate	2	y	p	2	-4200.78	-4304.78	-4222.02	-4316.83	203.379	4.4912	92.4134	257.395	TRUE	FALSE
SCD-0014	161.983	23.4637	8.53277	6.1	caldera	horse-shoe/eroded caldera	intraplate	1	n	n	15	-5252	-5239.23	-5086.56	-5372.52	118.178	10.9012	62.5752	86.7536	TRUE	FALSE
SCD-0055	-163.506	32.5719	7.36378	6.1	caldera	horse-shoe/eroded caldera	intraplate	2	y	p	2	-4202.19	-4359.92	-4226.12	-4331.97	308.621	18.3706	190.034	425.853	TRUE	FALSE
SCD-0027	-176.912	-24.5897	13.5706	6.1	caldera	full caldera	volcanic arc	3	n	n	6	-1125.48	-938.438	-901.219	-1235.14	114.238	152.494	150.627	126.51	TRUE	FALSE
SCD-0028	-148.259	54.4611	13.0215	6.2	caldera	full caldera	intraplate	1	y	n	5	-3565.11	-3301.48	-3293.34	-3701.98	168.175	21.5711	104.121	250.79	TRUE	FALSE
SCD-0034	147.158	-2.96593	11.6494	6.3	caldera	horse-shoe/eroded caldera	divergent	3	n	n	3	-1082.02	-908.219	-886.125	-1198.06	83.724	47.7187	98.7774	187.688	TRUE	FALSE
SCD-0039	-139.4	55.3803	5.68149	6.6	caldera	horse-shoe/eroded caldera	intraplate	1	y	n	3	-3262.48	-3246.56	-3226.06	-3284.08	12.581	5.07098	23.0264	9.63604	TRUE	FALSE
SCD-0020	-140.827	-2.10961	10.2222	7	caldera	horse-shoe/eroded caldera	intraplate	1	y	n	8	-4293.06	-4203.89	-4189.67	-4369.88	47.6501	32.3898	73.7483	85.3695	TRUE	FALSE
SCD-0011	-125.401	36.7807	6.15863	7	caldera	full caldera	intraplate	2	y	p	4	-3059.44	-3020.86	-2996.25	-3343.08	71.5945	9.20914	27.971	146.148	TRUE	FALSE
SCD-0012	-147.954	-17.4796	26.4789	7.5	caldera	full caldera	intraplate	1	y	n	19	-3702.94	-3476.19	-3410.77	-3831.11	251.938	34.0587	152.869	255.157	TRUE	FALSE
SCD-0019	-146.788	25.4086	12.3266	8.2	caldera	horse-shoe/eroded caldera	intraplate	2	n	n	8	-5014.25	-4936.06	-4739.83	-5195.28	163.117	100.795	253.439	78.6274	TRUE	FALSE
SCD-0013	-174.005	-15.3576	14.8779	9.75	caldera	horse-shoe/eroded caldera	volcanic arc	2	y	n	17	-1967.81	-1797.25	-1522.19	-2227.77	192.014	22.7349	158.956	172.16	TRUE	FALSE
SCD-0030	148.229	-4.09697	19.1163	12	caldera	horse-shoe/eroded caldera	intraplate	3	n	n	5	-1269.84	-1180.34	-1007.5	-1518.5	192.518	78.0036	211.543	224.602	TRUE	FALSE
SCD-0006	125.443	2.703	15.0659	13	caldera	horse-shoe/eroded caldera	volcanic arc	4	n	p	19	92.9219	-241.844	-53.7656	-107.094	416.872	69.3308	202.664	518.199	TRUE	FALSE
SCD-0008	8.78995	-47.9498	10.4972	15	caldera	full caldera	intraplate	2	n	p	7	-1377.97	-1717.59	-1414.55	-1593.25	183.787	38.1247	144.63	223.484	TRUE	FALSE
SCD-0043	-28.2952	-59.6846	19.148	15.6	caldera	full caldera	volcanic arc	1	n	n	2	-1467.69	-1247.02	-1104.88	-1675.36	308.715	231.695	390.568	296.851	TRUE	FALSE
SCD-0041	158.948	23.9329	21.9736	19	caldera	horse-shoe/eroded caldera	intraplate	2	n	n	3	-3834.77	-3967.25	-3534.19	-4211.78	949.906	35.2256	652.715	954.456	TRUE	FALSE
