# Supplementary material for: Global machine-learning detection of submarine calderas
Source: Research Square preprint supplement (doi:10.21203/rs.3.rs-7313707/v1), 2025-08-19
Supplement: Supplementary file 2 [file f0ef84b158ec913424eb5096.xlsx]

## Sheet: Sheet1
ID	Long	Lat	Feature_Diameter_km	Caldera_Diamater_km	Type	Sub_Type	Multibeam	positive/negative	duplicates	Stage	ring_mean	centre_mea	inner_mean	outer_mean	ring_std	centre_std	inner_std	outer_std	ridge	peak	Tectonic_setting
A-1	-148.163	-15.0228	25.1363	<Null>	atoll	young atoll	n	p	20	N/A	-173.688	-81.4531	-39.25	-853.188	320.079	19.1066	61.4515	394.132	TRUE	FALSE	intraplate
A-10	-175.769	-12.2128	13.4177	<Null>	atoll	young atoll	y	p	16	N/A	-1048.45	-1187.16	-1035.62	-1348.53	149.369	7.14409	61.4686	330.317	TRUE	FALSE	intraplate
A-11	-5.72548	-12.9442	13.9984	<Null>	atoll	young atoll	n	p	16	N/A	-268.156	-139.766	-132.609	-825.422	197.436	7.56171	97.7348	315.655	TRUE	FALSE	intraplate
A-12	-146.025	-15.9105	28.065	<Null>	atoll	young atoll	n	p	15	N/A	-171.375	-80.5312	-43.6719	-600.266	266.619	18.1392	61.2347	492.806	TRUE	FALSE	intraplate
A-13	-148.489	-12.0525	13.2198	<Null>	atoll	young atoll	n	p	14	N/A	-279.812	-141.938	-72.6875	-868.078	224.536	2.68022	54.0445	392.731	TRUE	FALSE	intraplate
A-14	162.231	11.5051	38.4703	<Null>	atoll	young atoll	n	p	12	N/A	-305.359	-45.625	-27.8906	-1468.7	451.617	9.99609	32.4018	747.763	TRUE	FALSE	intraplate
A-15	155.394	-4.7678	19.5666	<Null>	atoll	young atoll	n	p	12	N/A	-92.3594	-61.6719	17.4375	-547.344	129.521	4.06607	40.7837	321.9	TRUE	FALSE	intraplate
A-16	-87.2669	-25.4808	15.0417	<Null>	atoll	sunk atoll	n	p	10	N/A	-311.078	-82.9531	-80.2656	-862	245.471	5.60254	54.8214	375.004	TRUE	FALSE	intraplate
A-17	166.784	11.3237	38.0114	<Null>	atoll	young atoll	n	p	10	N/A	-124.016	-52.75	-27.1562	-944.453	216.502	3.98042	25.0937	486.816	TRUE	FALSE	intraplate
A-18	-139.607	-8.08909	11.1038	<Null>	atoll	young atoll	n	p	9	N/A	-134.922	-18.375	-8.59375	-651.406	129.25	2.03485	25.2517	304.093	TRUE	FALSE	intraplate
A-19	153.167	17.4097	12.8654	<Null>	atoll	sunk atoll	n	p	9	N/A	-1050.08	-1114.95	-1022.84	-1395.62	379.35	29.969	246.034	429.407	TRUE	FALSE	intraplate
A-2	-146.325	-15.4498	30.0415	<Null>	atoll	young atoll	n	p	20	N/A	-182.281	-155.656	-101.891	-651.594	303.242	20.3725	82.7232	464.615	TRUE	FALSE	intraplate
A-20	168.861	12.1626	15.7463	<Null>	atoll	young atoll	n	p	9	N/A	-131.141	-49.4844	-32.1562	-717.062	72.0286	0.728701	15.204	171.046	TRUE	FALSE	intraplate
A-21	-144.886	-16.1849	20.9916	<Null>	atoll	young atoll	n	p	8	N/A	-11.7031	-292.969	-103.625	-150.375	23.9548	5.52542	72.5721	152.376	TRUE	FALSE	intraplate
A-22	160.047	15.6745	14.7897	<Null>	atoll	sunk atoll	n	p	8	N/A	-1210.22	-1082.48	-1052.09	-1853.12	154.724	6.19474	129.639	269.011	TRUE	FALSE	intraplate
A-23	-144.975	-19.8927	11.1455	<Null>	atoll	young atoll	n	p	8	N/A	-95.9375	8.1875	16.8906	-442.812	137.986	5.5421	37.2928	221.3	TRUE	FALSE	intraplate
A-24	2.40353	-42.9716	12.2059	<Null>	atoll	sunk atoll	n	p	7	N/A	-449.547	-353.688	-325.234	-1062.06	204.121	18.7023	134.161	324.385	TRUE	FALSE	intraplate
A-25	170.109	12.2453	12.5568	<Null>	atoll	young atoll	n	p	7	N/A	-126.609	-6.78125	9.60938	-678.375	180.918	3.79337	23.4665	481.582	TRUE	FALSE	intraplate
A-26	-142.617	-17.5987	12.5819	<Null>	atoll	young atoll	n	p	6	N/A	-68.5156	-55.375	-9.0625	-346.25	129.298	16.1037	31.6133	303.482	TRUE	FALSE	intraplate
A-27	-141.477	-17.3794	9.81729	<Null>	atoll	young atoll	n	p	6	N/A	-101.391	14.4531	17.8594	-385.625	139.392	8.84755	45.5353	270.702	TRUE	FALSE	intraplate
A-28	-145.289	-16.7321	12.623	<Null>	atoll	young atoll	n	p	5	N/A	-44.2344	-21	29.25	-272.891	95.4397	17.0514	75.0764	271.899	TRUE	FALSE	intraplate
A-29	151.782	7.49085	45.0008	<Null>	atoll	young atoll	n	p	5	N/A	-180.031	-47.8281	-19.1875	-1115.34	322.221	8.33396	42.7701	1062.69	TRUE	FALSE	intraplate
A-3	-145.168	-15.8732	19.4383	<Null>	atoll	young atoll	n	p	20	N/A	-16.1875	-109.141	-7.20312	-388.625	77.1589	4.72648	43.2374	241.659	TRUE	FALSE	intraplate
A-30	153.601	5.43318	32.4576	<Null>	atoll	young atoll	n	p	5	N/A	-224.625	-45.0625	-20.4688	-619.484	303.894	5.60099	61.0156	474.046	TRUE	FALSE	intraplate
A-31	-145.982	-24.6496	12.3381	<Null>	atoll	young atoll	n	p	5	N/A	-69.9531	-66.2656	13.2656	-505.906	111.171	13.433	25.1845	275.842	TRUE	FALSE	intraplate
A-32	-147.73	-15.086	34.1862	<Null>	atoll	young atoll	n	p	5	N/A	-36.9219	-113.266	-107.5	-395.531	59.6077	3.0631	50.2205	396.208	TRUE	FALSE	intraplate
A-33	0.423454	-9.83835	12.9484	<Null>	atoll	young atoll	n	p	4	N/A	-207.703	-43.9688	-36.5312	-746.953	187.871	1.53061	24.168	512.963	TRUE	FALSE	intraplate
A-34	73.0314	8.27834	10.7264	<Null>	atoll	young atoll	n	p	4	N/A	-113.969	9.71875	15.9062	-343.375	145.269	1.59559	64.2631	278.397	TRUE	FALSE	intraplate
A-35	-154.086	-18.3795	17.0471	<Null>	atoll	sunk atoll	n	p	4	N/A	-710.469	-685.406	-673.156	-1205.31	435.126	33.4779	279.648	595.84	TRUE	FALSE	intraplate
A-36	-176.781	-12.5274	15.2818	<Null>	atoll	young atoll	n	p	4	N/A	-166.719	-76.5469	-67.0938	-426.578	145.894	7.43078	62.4732	266.224	TRUE	FALSE	intraplate
A-37	-138.543	-20.8252	8.54606	<Null>	atoll	young atoll	n	p	4	N/A	-100.281	-5.46875	2.375	-510.078	122.651	1.32251	13.5399	308.578	TRUE	FALSE	intraplate
A-38	-8.59255	-40.1122	10.4874	<Null>	atoll	sunk atoll	n	p	4	N/A	-266.094	-149.062	-95.4844	-676.156	174.913	1.90292	41.6147	294.002	TRUE	FALSE	intraplate
A-39	-84.6645	-25.8388	10.1823	<Null>	atoll	sunk atoll	n	p	4	N/A	-431.734	-330.219	-307.328	-755.219	245.008	29.8127	203.85	211.363	TRUE	FALSE	intraplate
A-4	168.713	4.62778	16.1842	<Null>	atoll	young atoll	n	p	20	N/A	-131.406	-22.0469	0.703125	-756.562	170.682	10.9508	31.9935	295.401	TRUE	FALSE	intraplate
A-40	153.387	-1.85112	49.0995	<Null>	atoll	young atoll	n	p	4	N/A	-586.5	-197.172	-169.516	-2208.2	738.034	18.956	423.14	920.862	TRUE	FALSE	intraplate
A-41	-168.65	24.9796	27.3319	<Null>	atoll	sunk atoll	y	n	17	N/A	-3064.95	-2617.11	-2551.5	-3205.39	503.22	381.866	194.5	765.634	TRUE	FALSE	intraplate
A-42	146.72	-4.88968	10.2521	<Null>	atoll	young atoll	n	n	4	N/A	-1209.05	-1438.55	-782.953	-1434.03	215.222	183.067	195.632	201.843	TRUE	FALSE	intraplate
A-43	-154.686	-16.5468	15.0871	<Null>	atoll	young atoll	n	p	3	N/A	-189.5	-211.656	-0.171875	-742.188	252.182	33.4558	45.702	347.853	TRUE	FALSE	<Null>
A-44	-2.61822	-12.8011	14.1094	<Null>	atoll	sunk atoll	n	p	3	N/A	-965.875	-682.766	-607.078	-1683.8	584.729	61.415	398.98	513.545	TRUE	FALSE	<Null>
A-45	171.096	8.27618	20.7171	<Null>	atoll	young atoll	n	p	3	N/A	-161.641	-42.4219	-22.2812	-804.766	224.725	3.36714	42.1765	487.433	TRUE	FALSE	<Null>
A-46	157.569	13.917	19.6292	<Null>	atoll	sunk atoll	n	p	3	N/A	-917.422	-891.469	-821.359	-1550.95	433.438	54.0069	369.709	599.331	TRUE	FALSE	<Null>
A-47	0.579659	-5.54041	10.4709	<Null>	atoll	young atoll	n	p	3	N/A	-193.812	1.53125	9.9375	-703.094	171.592	0.828567	25.1315	344.866	TRUE	FALSE	<Null>
A-48	171.2	37.6614	8.41702	<Null>	atoll	young atoll	n	p	3	N/A	-167.188	-21.2344	-17.2344	-580.391	83.8467	1.10031	20.3775	175.244	TRUE	FALSE	<Null>
A-49	-156.855	-8.85244	10.0245	<Null>	atoll	sunk atoll	n	p	3	N/A	-1539.55	-1443.22	-1315.62	-2025.88	615.093	56.0403	433.287	643.64	TRUE	FALSE	<Null>
A-5	73.2737	0.472517	66.037	<Null>	atoll	young atoll	n	n	20	N/A	-353.375	-76.5625	-32.0625	-1620.36	388.448	5.69779	25.24	722.353	TRUE	FALSE	intraplate
A-50	124.372	-6.05874	10.0975	<Null>	atoll	young atoll	n	p	3	N/A	25.6094	-16.0938	31.5469	-94.9844	66.8872	3.72374	29.6458	97.5821	TRUE	FALSE	<Null>
A-51	-144.38	-16.414	17.4131	<Null>	atoll	young atoll	n	p	3	N/A	-75.3438	-41.6875	-16.6094	-382.75	95.6034	8.70322	17.0061	297.124	TRUE	FALSE	<Null>
A-52	-8.09158	-39.3064	8.67339	<Null>	atoll	young atoll	n	p	2	N/A	-366.047	-354.219	-338.953	-495.766	142.476	6.89988	69.7853	244.665	TRUE	FALSE	<Null>
A-53	-145.216	-16.7636	10.8921	<Null>	atoll	young atoll	n	p	2	N/A	-8.39062	-35.3281	-19.875	-141.078	106.249	30.5543	107.271	270.586	TRUE	FALSE	<Null>
A-54	-140.401	-19.6312	6.86216	<Null>	atoll	young atoll	n	p	2	N/A	-31.5938	4.51562	6.73438	-224.406	40.7319	2.49369	22.4076	198.351	TRUE	FALSE	<Null>
A-55	169.771	36.6726	6.87891	<Null>	atoll	sunk atoll	n	p	2	N/A	-3919.64	-3896.59	-3880.89	-4122.58	44.1494	9.51925	43.3543	125.256	TRUE	FALSE	<Null>
A-56	151.77	8.52799	23.0563	<Null>	atoll	young atoll	n	p	2	N/A	-107.719	-37.0938	-15.0625	-662.984	151.456	2.7991	13.7487	375.458	TRUE	FALSE	<Null>
A-57	-171.818	-9.17426	10.7271	<Null>	atoll	young atoll	n	p	2	N/A	-166.469	-18.0312	28.25	-591.422	294.828	32.1505	92.3632	482.752	TRUE	FALSE	<Null>
A-58	56.2161	-7.14198	20.3026	<Null>	atoll	young atoll	n	p	2	N/A	-198.359	-16.3438	-1.70312	-689.078	202.336	6.46679	24.1478	375.828	TRUE	FALSE	<Null>
A-59	73.6952	10.8618	12.3703	<Null>	atoll	young atoll	n	p	2	N/A	-95.8281	-22.2344	-19.7812	-384.047	122.23	2.31667	24.1832	289.199	TRUE	FALSE	<Null>
A-6	-144.356	-17.1129	16.5664	<Null>	atoll	young atoll	n	p	19	N/A	-94.2969	-42.375	-13.3594	-763.141	120.577	19.2423	51.6839	437.077	TRUE	FALSE	intraplate
A-60	-134.343	-23.6532	10.6578	<Null>	atoll	young atoll	n	p	2	N/A	-221	-23.5312	-22.2969	-920.438	121.057	2.48098	15.7943	208.386	TRUE	FALSE	<Null>
A-61	73.0784	2.40359	52.5434	<Null>	atoll	young atoll	n	p	2	N/A	-375.359	-65.5469	-50.5156	-1080.09	305.828	28.7086	58.734	649.04	TRUE	FALSE	<Null>
A-62	144.165	26.0617	34.9336	<Null>	atoll	sunk atoll	y	p	2	N/A	-1471.55	-1238.47	-1142.88	-2364.62	392.805	21.7363	196.877	477.29	TRUE	FALSE	<Null>
A-7	152.252	8.69487	23.6304	<Null>	atoll	young atoll	n	p	19	N/A	-144.375	-31.1094	-14.2969	-857.438	131.018	3.41008	16.162	381.832	TRUE	FALSE	intraplete
A-8	155.308	7.51441	27.9916	<Null>	atoll	young atoll	n	p	19	N/A	-285.828	-156.625	-59.0938	-1138.7	398.13	33.4834	138.953	632.886	TRUE	FALSE	intraplate
A-9	-143.884	-16.5227	16.5383	<Null>	atoll	young atoll	n	p	18	N/A	-25.0938	-210	-90.875	-130.75	34.0765	5.67065	77.0492	183.53	TRUE	FALSE	intraplate
E-1	-164.312	11.5737	5.97724	<Null>	flank scar/eroded surface	flank scar/eroded surface	y	n	7	N/A	-4875.22	-4805.48	-4778.88	-4946.94	121.684	28.6362	139.639	70.3167	TRUE	FALSE	intraplate
E-10	167.174	18.0438	19.5499	<Null>	flank scar/eroded surface	flank scar/eroded surface	y	p	5	N/A	-3147.73	-3544.41	-3334.44	-3389.39	1045.62	86.1722	782.846	1101.4	TRUE	FALSE	intraplate
E-100	155.793	-27.8724	8.69128	<Null>	flank scar/eroded surface	flank scar/eroded surface	n	n	2	N/A	-4341.06	-4251.88	-4245.5	-4401.8	345.392	40.2696	210.174	428.604	TRUE	FALSE	<Null>
E-101	-88.5204	-61.6285	17.1393	<Null>	flank scar/eroded surface	flank scar/eroded surface	y	n	2	N/A	-4775.67	-4666.66	-4665.17	-4839.8	114.101	37.4701	95.3004	83.3656	TRUE	FALSE	<Null>
E-102	116.689	15.5113	9.30614	<Null>	flank scar/eroded surface	flank scar/eroded surface	n	n	2	N/A	-4097.77	-4038.11	-4032.83	-4179.53	87.1216	55.9696	85.6152	64.701	TRUE	FALSE	<Null>
E-103	-141.273	-28.0133	11.6883	<Null>	flank scar/eroded surface	flank scar/eroded surface	n	n	2	N/A	-3127.28	-3004.02	-2979.05	-3324.98	133.443	19.8577	64.4953	191.656	TRUE	FALSE	<Null>
E-104	146.329	14.6529	10.6306	<Null>	flank scar/eroded surface	flank scar/eroded surface	y	n	2	N/A	-4555.98	-4477.27	-4452.8	-4626.28	175.723	13.0794	143.705	146.522	TRUE	FALSE	<Null>
E-105	175.519	-8.77677	8.64008	<Null>	flank scar/eroded surface	flank scar/eroded surface	y	n	2	N/A	-4906.06	-4851.09	-4802.23	-5008.27	102.703	1.84322	101.381	152.125	TRUE	FALSE	<Null>
E-106	-146.582	-15.5398	92.561	<Null>	flank scar/eroded surface	flank scar/eroded surface	n	n	2	N/A	-1339.39	-713.391	-501.891	-1584.92	642.237	156.35	550.422	722.795	TRUE	FALSE	<Null>
E-107	-28.5441	31.4788	108.79	<Null>	flank scar/eroded surface	flank scar/eroded surface	n	n	2	N/A	-3108.56	-2232.88	-2040.22	-3225.03	701.217	187.269	810.091	1321.64	TRUE	FALSE	<Null>
E-108	-32.971	-32.232	6.49745	<Null>	flank scar/eroded surface	flank scar/eroded surface	n	n	2	N/A	-3938.62	-3920.08	-3850.28	-3980.02	44.5886	19.7075	95.136	38.2641	TRUE	FALSE	<Null>
E-109	-25.1803	48.1565	8.54771	<Null>	flank scar/eroded surface	flank scar/eroded surface	n	p	3	N/A	-3425.44	-3473.19	-3447.8	-3474.45	101.651	2.78879	32.9835	129.608	TRUE	FALSE	<Null>
E-11	173.621	1.40692	10.7792	<Null>	flank scar/eroded surface	flank scar/eroded surface	y	p	5	N/A	-3205.22	-3305.38	-3256.33	-3349.86	721.017	76.9674	523.271	784.333	TRUE	FALSE	intraplate
E-110	154.075	27.7441	11.2449	<Null>	flank scar/eroded surface	flank scar/eroded surface	n	p	3	N/A	-4416.95	-4646.84	-4482.55	-4609.53	816.192	66.0457	625.738	881.516	TRUE	FALSE	<Null>
E-111	167.268	19.3511	8.38215	<Null>	flank scar/eroded surface	flank scar/eroded surface	y	p	3	N/A	-2108.84	-2200.12	-2098.89	-2278.75	597.393	24.6599	363.973	759.462	TRUE	FALSE	<Null>
E-112	10.9103	-63.6436	14.2816	<Null>	flank scar/eroded surface	flank scar/eroded surface	n	p	3	N/A	-4496.69	-4652.34	-4539.23	-4556.23	168.369	14.3573	58.8355	285.555	TRUE	FALSE	<Null>
E-113	157.491	23.5996	15.3895	<Null>	flank scar/eroded surface	flank scar/eroded surface	n	p	3	N/A	-3171.91	-3374.39	-3223.67	-3400.61	960.219	73.2459	687.896	1090.85	TRUE	FALSE	<Null>
E-114	134.496	28.0004	38.9073	<Null>	flank scar/eroded surface	flank scar/eroded surface	n	p	3	N/A	-2754.94	-3536.45	-2963.84	-3022.97	814.495	36.0568	677.129	800.41	TRUE	FALSE	<Null>
E-115	-162.301	8.66723	7.48838	<Null>	flank scar/eroded surface	flank scar/eroded surface	y	p	3	N/A	-2864.27	-2994.84	-2859.03	-2972.23	527.763	16.9108	319.424	685.233	TRUE	FALSE	<Null>
E-116	-139.95	-1.81103	10.8263	<Null>	flank scar/eroded surface	flank scar/eroded surface	y	p	3	N/A	-2858.47	-3068.06	-2899.66	-3084.67	885.196	100.834	700.38	907.084	TRUE	FALSE	<Null>
E-117	-96.184	8.07221	4.32011	<Null>	flank scar/eroded surface	flank scar/eroded surface	y	p	3	N/A	-2989.28	-2976.62	-2952.55	-3127.47	262.022	13.2706	161.449	341.093	TRUE	FALSE	<Null>
E-118	170.556	37.6831	10.3768	<Null>	flank scar/eroded surface	flank scar/eroded surface	n	p	2	N/A	-3351.77	-3515.44	-3346.41	-3440.91	898.01	86.3534	726.561	1004.81	TRUE	FALSE	<Null>
E-119	125.324	1.94466	8.706	<Null>	flank scar/eroded surface	flank scar/eroded surface	n	p	2	N/A	-832.734	-1219.14	-896	-957.75	255.169	7.30126	233.859	375.038	TRUE	FALSE	<Null>
E-12	-141.441	-7.93239	8.38469	<Null>	flank scar/eroded surface	flank scar/eroded surface	n	p	4	N/A	-2782.75	-2915.45	-2885.69	-2911.69	623.462	73.0708	421.097	684.292	TRUE	FALSE	intraplate
E-120	-22.9823	3.35102	5.44136	<Null>	flank scar/eroded surface	flank scar/eroded surface	y	p	2	N/A	-4150.7	-4190.98	-4162.11	-4167.34	46.2502	5.38949	38.7791	65.7246	TRUE	FALSE	<Null>
E-121	-26.1538	25.8821	10.3584	<Null>	flank scar/eroded surface	flank scar/eroded surface	n	p	2	N/A	-3194.88	-3429.73	-3287.27	-3293.73	821.692	85.1756	599.754	1008.44	TRUE	FALSE	<Null>
E-122	-27.7095	27.1413	9.26926	<Null>	flank scar/eroded surface	flank scar/eroded surface	n	p	2	N/A	-4787.66	-4895.5	-4818.06	-4828.69	113.688	16.405	101.672	129.218	TRUE	FALSE	<Null>
E-123	-155.401	18.4713	12.1666	<Null>	flank scar/eroded surface	flank scar/eroded surface	y	p	2	N/A	-3443.14	-3714.98	-3542.92	-3584.86	858.457	69.4441	613.081	936.1	TRUE	FALSE	<Null>
E-124	144.252	11.2928	8.20972	<Null>	flank scar/eroded surface	flank scar/eroded surface	y	p	2	N/A	-4567.19	-4683.16	-4590.66	-4646.75	218.077	46.3034	144.594	275.701	TRUE	FALSE	<Null>
E-125	-144.319	26.4431	9.08828	<Null>	flank scar/eroded surface	flank scar/eroded surface	n	p	2	N/A	-4123.77	-4243.14	-4097.42	-4309.03	423.897	83.9345	382.325	338.075	TRUE	FALSE	<Null>
E-126	170.063	-21.1155	11.9862	<Null>	flank scar/eroded surface	flank scar/eroded surface	n	p	2	N/A	-1398.03	-1454.09	-1410.59	-1448.45	421.176	30.3252	266.99	487.652	TRUE	FALSE	<Null>
E-127	-150.231	-17.457	8.7142	<Null>	flank scar/eroded surface	flank scar/eroded surface	y	p	2	N/A	-2523.25	-2868.02	-2604.48	-2605.55	792.648	75.1069	612.789	889.908	TRUE	FALSE	<Null>
E-128	-38.1595	35.3628	6.06724	<Null>	flank scar/eroded surface	flank scar/eroded surface	y	p	2	N/A	-3289.16	-3344.72	-3293	-3305.94	95.3153	7.9086	56.5166	132.207	TRUE	FALSE	<Null>
E-129	-25.7626	37.3647	6.9369	<Null>	flank scar/eroded surface	flank scar/eroded surface	y	p	2	N/A	-650.984	-728.859	-667.219	-694.094	218.276	15.6174	151.805	315.825	TRUE	FALSE	<Null>
E-13	-24.6966	-1.86434	8.43951	<Null>	flank scar/eroded surface	flank scar/eroded surface	y	p	4	N/A	-4434.05	-4575.95	-4465.8	-4501.61	258.544	3.10961	126.497	369.023	TRUE	FALSE	intraplate
E-130	-129.487	29.6793	9.52554	<Null>	flank scar/eroded surface	flank scar/eroded surface	y	p	2	N/A	-4521.92	-4593.73	-4543.59	-4545.53	104.688	9.67639	57.9757	143.545	TRUE	FALSE	<Null>
E-131	-151.917	46.3803	10.855	<Null>	flank scar/eroded surface	flank scar/eroded surface	y	p	2	N/A	-4854.88	-4975.62	-4911.39	-4932.92	189.235	34.5884	157.61	263.721	TRUE	FALSE	<Null>
E-132	-130.12	41.1773	5.63963	<Null>	flank scar/eroded surface	flank scar/eroded surface	y	p	2	N/A	-1679	-1676.41	-1642.98	-1863.44	197.197	10.8509	88.6839	315.067	TRUE	FALSE	<Null>
E-133	170.621	-19.6562	6.86216	<Null>	flank scar/eroded surface	flank scar/eroded surface	n	p	2	N/A	-1244.73	-1286.69	-1235.69	-1376.69	463.544	33.1356	297.59	495.069	TRUE	FALSE	<Null>
E-134	145.777	16.9454	15.0936	<Null>	flank scar/eroded surface	flank scar/eroded surface	y	p	2	N/A	-1141.97	-1538.28	-1293.91	-1305.31	576.25	72.281	440.815	591.453	TRUE	FALSE	<Null>
E-135	-176.611	28.3457	27.5601	<Null>	flank scar/eroded surface	flank scar/eroded surface	n	p	2	N/A	-3022.56	-3496.73	-3217.64	-3262.3	1305.36	81.3582	904.147	1352.84	TRUE	FALSE	<Null>
E-136	175.339	-2.46412	14.5131	<Null>	flank scar/eroded surface	flank scar/eroded surface	y	p	2	N/A	-3240.8	-3456.8	-3413.66	-3421.19	1048.82	129.092	738.448	1081.82	TRUE	FALSE	<Null>
E-137	9.77777	-47.6884	17.7135	<Null>	flank scar/eroded surface	flank scar/eroded surface	n	p	2	N/A	-764	-633.781	-606.531	-1232.83	304.762	10.5066	134.366	590.012	TRUE	FALSE	<Null>
E-138	178.974	13.4644	8.64291	<Null>	flank scar/eroded surface	flank scar/eroded surface	n	p	2	N/A	-3255.94	-3418	-3282.31	-3325.06	603.048	19.4615	450.579	748.412	TRUE	FALSE	<Null>
E-139	-170.584	-35.2714	9.68088	<Null>	flank scar/eroded surface	flank scar/eroded surface	y	p	2	N/A	-3356.98	-3837.81	-3480.16	-3506.34	1014.12	114.069	814.304	1090.91	TRUE	FALSE	<Null>
E-14	-173.458	-4.36519	10.3669	<Null>	flank scar/eroded surface	flank scar/eroded surface	y	p	4	N/A	-5117.2	-5181.55	-5154.38	-5168.08	145.918	4.26442	71.6577	143.697	TRUE	FALSE	intraplate
E-140	-12.2132	-47.2553	4.77702	<Null>	flank scar/eroded surface	flank scar/eroded surface	y	p	2	N/A	-2360.97	-2431.39	-2355.42	-2556.95	199.866	42.448	138.637	392.101	TRUE	FALSE	<Null>
E-141	133.456	26.9421	17.488	<Null>	flank scar/eroded surface	flank scar/eroded surface	n	p	2	N/A	-3488.56	-3815.42	-3577.44	-3708.98	256.09	5.44806	157.068	285.906	TRUE	FALSE	intraplate
E-142	-172.131	-18.7405	22.3099	<Null>	flank scar/eroded surface	flank scar/eroded surface	y	p	2	N/A	-2775.34	-3192.34	-2915.44	-2984.27	1165.89	85.9353	815.067	1381.26	TRUE	FALSE	<Null>
E-143	0.721404	-31.468	13.8402	<Null>	flank scar/eroded surface	flank scar/eroded surface	y	p	2	N/A	-3225.83	-3547.27	-3360.47	-3392.22	974.116	102.763	683.747	1000.12	TRUE	FALSE	<Null>
E-144	-175.468	27.7823	13.1079	<Null>	flank scar/eroded surface	flank scar/eroded surface	y	p	2	N/A	-2678.44	-2629.23	-2628.67	-2887.59	514.042	34.8791	267.006	764.506	TRUE	FALSE	<Null>
E-145	171.165	35.6314	27.6633	<Null>	flank scar/eroded surface	flank scar/eroded surface	n	p	2	N/A	-627.469	-936.516	-678.656	-773.797	305.948	16.7201	203.249	367.028	TRUE	FALSE	<Null>
E-15	144.853	7.69579	9.64218	<Null>	flank scar/eroded surface	flank scar/eroded surface	n	p	4	N/A	-1707.08	-1998.28	-1795.39	-1817.58	385.247	52.9051	238.023	376.362	TRUE	FALSE	intraplate
E-16	131.036	7.54705	7.96959	<Null>	flank scar/eroded surface	flank scar/eroded surface	n	p	4	N/A	-5107.45	-5201.5	-5126.05	-5175.36	172.023	15.9922	103.316	205.062	TRUE	FALSE	intraplate
E-17	149.126	15.782	25.498	<Null>	flank scar/eroded surface	flank scar/eroded surface	y	p	4	N/A	-3952.64	-4617.61	-4174.73	-4190.14	842.51	41.6051	566.459	1021.72	TRUE	FALSE	intraplate
E-18	157.179	6.18764	78.3819	<Null>	flank scar/eroded surface	flank scar/eroded surface	y	n	20	N/A	-2729.91	-3119.8	-2237.09	-3347.64	1114.26	5.87149	394.829	1117.54	TRUE	FALSE	intraplate
E-19	-58.6489	35.5715	16.678	<Null>	flank scar/eroded surface	flank scar/eroded surface	y	n	14	N/A	-4442.14	-4247.22	-3912.36	-4813.92	305.584	335.561	391.453	252.308	TRUE	FALSE	intraplate
E-2	-118.825	20.8111	6.5733	<Null>	flank scar/eroded surface	flank scar/eroded surface	y	n	6	N/A	-3948.66	-3845.36	-3842.28	-4011.41	59.0996	23.5096	98.3072	30.4018	TRUE	FALSE	intraplate
E-20	-84.965	4.79007	61.4829	<Null>	flank scar/eroded surface	flank scar/eroded surface	y	n	13	N/A	-2764.98	-2372.5	-2217.88	-2965.39	497.925	24.4777	463.843	296.708	TRUE	FALSE	intraplate
E-21	-172.637	30.1497	32.9178	<Null>	flank scar/eroded surface	flank scar/eroded surface	n	n	12	N/A	-4715.53	-4240.12	-4009.69	-5151.84	421.627	85.7958	460.876	316.135	TRUE	FALSE	intraplate
E-22	-158.488	24.1835	9.1903	<Null>	flank scar/eroded surface	flank scar/eroded surface	y	n	12	N/A	-4568.58	-4473.44	-4467.59	-4633.08	48.9208	37.0565	66.195	36.9037	TRUE	FALSE	intraplate
E-23	-147.016	29.8782	9.23576	<Null>	flank scar/eroded surface	flank scar/eroded surface	y	n	12	N/A	-4923.55	-4809.67	-4802.58	-4978.31	68.0319	23.7204	53.4041	68.9631	TRUE	FALSE	intraplate
E-24	-98.2023	14.5628	20.2244	<Null>	flank scar/eroded surface	flank scar/eroded surface	y	n	11	N/A	-3428.83	-3335.66	-3242.73	-3505.89	185.674	46.355	89.1761	157.486	TRUE	FALSE	intraplate
E-25	-156.417	-24.169	35.1182	<Null>	flank scar/eroded surface	flank scar/eroded surface	n	n	10	N/A	-3810.38	-3604.89	-3210.27	-4288.2	404.131	223.069	645.216	195.683	TRUE	FALSE	intraplate
E-26	-72.8357	22.6195	22.4203	<Null>	flank scar/eroded surface	flank scar/eroded surface	n	n	10	N/A	-3516.52	-2911.02	-2856.66	-3880.59	600.135	115.454	507.582	840.765	TRUE	FALSE	intraplate
E-27	157.217	-26.929	36.1495	<Null>	flank scar/eroded surface	flank scar/eroded surface	n	n	9	N/A	-3598.19	-3587.8	-3478.33	-3827.52	459.589	20.4994	281.421	714.361	TRUE	FALSE	intraplate
E-28	-51.3342	-58.0145	35.79	<Null>	flank scar/eroded surface	flank scar/eroded surface	n	n	6	N/A	-3972.88	-3619.81	-3539.86	-4047.36	232.117	56.9679	385.554	196.552	TRUE	FALSE	intraplate
E-29	-152.974	-22.4825	39.6182	<Null>	flank scar/eroded surface	flank scar/eroded surface	n	n	6	N/A	-3180.56	-3096.08	-2877.55	-3602.92	1117.57	138.984	573.332	1177.33	TRUE	FALSE	intraplate
E-3	-39.3363	57.8427	6.45517	<Null>	flank scar/eroded surface	flank scar/eroded surface	n	n	4	N/A	-3147.58	-3129.14	-3090.28	-3175.55	79.5196	16.7732	66.6205	77.838	TRUE	FALSE	intraplate
E-30	-95.1095	8.05826	7.81579	<Null>	flank scar/eroded surface	flank scar/eroded surface	y	n	6	N/A	-3590.45	-3582.56	-3468.11	-3687.14	90.5185	9.09305	216.008	24.438	TRUE	FALSE	intraplate
E-31	149.36	15.8307	8.67865	<Null>	flank scar/eroded surface	flank scar/eroded surface	y	n	6	N/A	-5051.77	-5035.56	-5016.48	-5122.08	195.24	36.5778	108.407	297.796	TRUE	FALSE	intraplate
E-32	-173.26	-18.4183	14.3191	<Null>	flank scar/eroded surface	flank scar/eroded surface	y	n	6	N/A	-3798.22	-3581.75	-3444.94	-3980.92	464.094	59.9536	499.46	392.613	TRUE	FALSE	volcanic arc
E-33	-135.28	-10.0279	8.98663	<Null>	flank scar/eroded surface	flank scar/eroded surface	y	n	5	N/A	-4259.22	-4149.28	-4109.08	-4305.08	54.0496	13.5928	94.4827	106.521	TRUE	FALSE	intraplate
E-34	172.812	3.35159	66.4807	<Null>	flank scar/eroded surface	flank scar/eroded surface	n	n	5	N/A	-3012.86	-2900.62	-1690.62	-3754.95	1228.67	220.568	1355.19	866.843	TRUE	FALSE	intraplate
E-35	-130.827	46.1678	8.32605	<Null>	flank scar/eroded surface	flank scar/eroded surface	y	n	5	N/A	-2960.81	-2901.39	-2898.34	-2983.2	70.8612	15.9193	93.8854	80.4798	TRUE	FALSE	intraplate
E-36	72.6086	-45.2554	11.107	<Null>	flank scar/eroded surface	flank scar/eroded surface	n	n	5	N/A	-3628.53	-3449.05	-3447.77	-3755.95	229.394	10.9294	235.693	155.615	TRUE	FALSE	intraplate
E-37	-96.9059	14.3193	9.73967	<Null>	flank scar/eroded surface	flank scar/eroded surface	n	n	5	N/A	-3290.39	-3126.89	-3107.84	-3404.36	117.923	28.0196	168.809	53.9199	TRUE	FALSE	intraplate
E-38	-172.547	21.0951	8.99741	<Null>	flank scar/eroded surface	flank scar/eroded surface	y	n	4	N/A	-5128.09	-5127.36	-5089.73	-5205.47	66.6598	11.9522	70.8496	35.9035	TRUE	FALSE	intraplate
E-39	-40.0158	-26.7072	36.1413	<Null>	flank scar/eroded surface	flank scar/eroded surface	n	n	4	N/A	-3734.58	-3331.91	-3130.86	-4011.78	279.782	92.1571	530.023	211.586	TRUE	FALSE	intraplate
E-4	-123.391	30.7397	7.95	<Null>	flank scar/eroded surface	flank scar/eroded surface	y	n	4	N/A	-3969.86	-3914.5	-3910.7	-4004.12	62.4029	4.42295	56.7127	53.8648	TRUE	FALSE	intraplate
E-40	-49.0782	-56.5197	47.1285	<Null>	flank scar/eroded surface	flank scar/eroded surface	n	n	4	N/A	-4068.64	-3568.61	-3491	-4342.09	610.337	79.3118	383.511	736.157	TRUE	FALSE	intraplate
E-41	-112.355	-33.6402	14.3186	<Null>	flank scar/eroded surface	flank scar/eroded surface	n	n	4	N/A	-2705.3	-2506.08	-2489.28	-2781.22	123.768	70.1842	196.753	137.333	TRUE	FALSE	divergent
E-42	59.4374	-4.14406	33.5138	<Null>	flank scar/eroded surface	flank scar/eroded surface	n	n	4	N/A	-3572.41	-3202.38	-3189.33	-3887.56	310.331	258.131	287.245	251.179	TRUE	FALSE	intraplate
E-43	-33.2849	33.1185	10.6426	<Null>	flank scar/eroded surface	flank scar/eroded surface	y	n	4	N/A	-3546.38	-3454.58	-3426.36	-3624.88	88.9544	23.3277	114.855	60.7437	TRUE	FALSE	intraplate
E-44	168.434	-26.6965	5.87641	<Null>	flank scar/eroded surface	flank scar/eroded surface	n	n	4	N/A	-2549.91	-2434.48	-2389.33	-2630.8	98.6059	44.274	120.781	110.838	TRUE	FALSE	intraplate
E-45	-30.1147	-4.50947	7.18046	<Null>	flank scar/eroded surface	flank scar/eroded surface	y	n	3	N/A	-4764.3	-4753.56	-4710.22	-4810.69	89.4853	30.2143	93.8743	55.9268	TRUE	FALSE	<Null>
E-46	-108.388	18.3183	8.39069	<Null>	flank scar/eroded surface	flank scar/eroded surface	n	n	3	N/A	-3343.86	-3298.72	-3282.86	-3387.61	69.3246	17.8207	113.906	45.4198	TRUE	FALSE	<Null>
E-47	-147.076	33.2033	4.33221	<Null>	flank scar/eroded surface	flank scar/eroded surface	y	n	3	N/A	-5371.92	-5341.5	-5336.5	-5432.44	136.472	8.40759	108.399	147.913	TRUE	FALSE	<Null>
E-48	-135.291	39.667	9.83037	<Null>	flank scar/eroded surface	flank scar/eroded surface	y	n	3	N/A	-4737.06	-4631.59	-4625.38	-4799.44	241.307	4.25998	76.5099	304.601	TRUE	FALSE	<Null>
E-49	-122.543	27.395	4.32857	<Null>	flank scar/eroded surface	flank scar/eroded surface	n	n	3	N/A	-4351.7	-4305.91	-4285.64	-4400.52	46.282	3.38987	54.2579	29.8182	TRUE	FALSE	<Null>
E-5	-12.8967	30.2182	6.38577	<Null>	flank scar/eroded surface	flank scar/eroded surface	n	n	4	N/A	-1989.94	-1851.09	-1840.02	-2059.34	270.825	42.519	200.394	314.368	TRUE	FALSE	intraplate
E-50	166.835	18.2986	4.32359	<Null>	flank scar/eroded surface	flank scar/eroded surface	y	n	3	N/A	-4702.94	-4679.72	-4623.23	-4764.22	68.6631	14.8371	101.139	46.3082	TRUE	FALSE	<Null>
E-51	-153.561	24.4808	9.03902	<Null>	flank scar/eroded surface	flank scar/eroded surface	y	n	3	N/A	-4885.67	-4797.67	-4758	-4948.98	116.579	27.0081	104.278	146.144	TRUE	FALSE	<Null>
E-52	-157.752	24.004	7.73504	<Null>	flank scar/eroded surface	flank scar/eroded surface	y	n	3	N/A	-4157.2	-4041.62	-4035.84	-4292.5	118.771	38.8102	72.9431	115.338	TRUE	FALSE	<Null>
E-53	145.36	17.4581	6.29951	<Null>	flank scar/eroded surface	flank scar/eroded surface	y	n	3	N/A	-3495.97	-3382.16	-3381.5	-3558.89	81.452	10.8803	100.262	101.175	TRUE	FALSE	<Null>
E-54	142.364	5.98468	7.72322	<Null>	flank scar/eroded surface	flank scar/eroded surface	n	n	3	N/A	-2067.36	-2041.56	-2007.56	-2080.47	71.7764	47.2619	109.43	111.865	TRUE	FALSE	<Null>
E-55	144.604	11.1878	7.11177	<Null>	flank scar/eroded surface	flank scar/eroded surface	y	n	3	N/A	-3933.11	-3824.38	-3820.59	-4016.72	94.632	10.978	105.762	83.3497	TRUE	FALSE	<Null>
E-56	-167.462	-12.8968	6.76839	<Null>	flank scar/eroded surface	flank scar/eroded surface	n	n	3	N/A	-5301.27	-5268.22	-5186.89	-5352.55	74.0176	21.9434	107.111	91.7442	TRUE	FALSE	<Null>
E-57	-141.801	50.4142	5.3007	<Null>	flank scar/eroded surface	flank scar/eroded surface	y	n	3	N/A	-3676.31	-3594.81	-3591.16	-3659.31	202.607	18.6387	68.9126	283.878	TRUE	FALSE	<Null>
E-58	-42.9118	30.8616	14.5191	<Null>	flank scar/eroded surface	flank scar/eroded surface	y	n	3	N/A	-3086.56	-2781.08	-2779.52	-3251.77	236.997	15.6418	172.655	293.29	TRUE	FALSE	<Null>
E-59	-162.259	24.5037	11.974	<Null>	flank scar/eroded surface	flank scar/eroded surface	y	n	3	N/A	-4841	-4875.34	-4846.5	-4846.67	96.9795	23.3688	86.8508	143.534	TRUE	FALSE	<Null>
E-6	-16.34	39.1272	7.45886	<Null>	flank scar/eroded surface	flank scar/eroded surface	n	n	11	N/A	-4954.91	-5061.38	-5014.22	-5016.14	137.971	6.37255	57.3336	186.462	TRUE	FALSE	intraplate
E-60	174.988	20.5332	21.2242	<Null>	flank scar/eroded surface	flank scar/eroded surface	y	n	3	N/A	-3198.17	-2939.3	-2936.31	-3345.39	532.79	26.9969	317.63	599.746	TRUE	FALSE	<Null>
E-61	-45.0481	15.2932	14.1117	<Null>	flank scar/eroded surface	flank scar/eroded surface	y	n	3	N/A	-4110.42	-3865.45	-3693.55	-4362.52	440.047	93.9681	390.461	355.893	TRUE	FALSE	<Null>
E-62	-172.009	16.9595	22.6832	<Null>	flank scar/eroded surface	flank scar/eroded surface	y	n	3	N/A	-5053.47	-4773.52	-4751.31	-5233.02	247.133	133.464	364.024	144.428	TRUE	FALSE	<Null>
E-63	-166.064	-0.78393	28.8121	<Null>	flank scar/eroded surface	flank scar/eroded surface	y	n	3	N/A	-5332.62	-5254.84	-5253.53	-5381.89	159.135	11.6394	94.059	162.815	TRUE	FALSE	<Null>
E-64	-87.1371	-54.0412	16.6416	<Null>	flank scar/eroded surface	flank scar/eroded surface	n	n	3	N/A	-4974.28	-4962.41	-4849.47	-5028.39	111.411	38.0656	144.201	91.3682	TRUE	FALSE	<Null>
E-65	118.801	16.6917	61.044	<Null>	flank scar/eroded surface	flank scar/eroded surface	n	n	3	N/A	-3503.38	-4079	-3165.08	-3992.83	534.263	25.129	723.075	377.979	TRUE	FALSE	<Null>
E-66	-117.268	-10.75	20.8642	<Null>	flank scar/eroded surface	flank scar/eroded surface	y	n	3	N/A	-3924.53	-3912.83	-3842.97	-4027.44	131.986	20.9438	134.064	86.838	TRUE	FALSE	<Null>
E-67	140.415	30.3	74.391	<Null>	flank scar/eroded surface	flank scar/eroded surface	n	n	3	N/A	-2092.44	-1847.28	-1660.08	-2412.67	565.066	86.0749	644.538	566.077	TRUE	FALSE	<Null>
E-68	-142.962	52.0254	27.1192	<Null>	flank scar/eroded surface	flank scar/eroded surface	y	n	3	N/A	-3321.73	-3393.38	-3071.53	-3666.83	364.45	45.4737	559.835	175.691	TRUE	FALSE	<Null>
E-69	-155.363	1.98261	6.85458	<Null>	flank scar/eroded surface	flank scar/eroded surface	y	n	2	N/A	-4360.83	-4386.86	-4328.61	-4444.33	225.155	27.8174	155.145	251.063	TRUE	FALSE	<Null>
E-7	-150.435	-14.1864	11.2817	<Null>	flank scar/eroded surface	flank scar/eroded surface	n	p	8	N/A	-2405.28	-2654.33	-2488.61	-2557.73	556.252	54.0515	393.895	692.224	TRUE	FALSE	intraplate
E-70	-138.702	-21.2999	8.92245	<Null>	flank scar/eroded surface	flank scar/eroded surface	n	n	2	N/A	-4173.38	-4131.56	-4118.25	-4226.22	66.692	8.55839	68.3769	64.4209	TRUE	FALSE	<Null>
E-71	-178.693	-17.6642	44.5382	<Null>	flank scar/eroded surface	flank scar/eroded surface	n	n	2	N/A	-647.266	-323.484	-209.859	-931.125	196.184	76.1101	176.326	392.306	TRUE	FALSE	<Null>
E-72	-156.79	-9.47956	33.5078	<Null>	flank scar/eroded surface	flank scar/eroded surface	n	n	2	N/A	-4547.97	-4321.81	-4186.3	-4900.25	1187.14	83.6826	1015.04	1004.84	TRUE	FALSE	<Null>
E-73	-34.1986	44.6615	45.8717	<Null>	flank scar/eroded surface	flank scar/eroded surface	y	n	2	N/A	-3000.86	-2529.23	-2494.08	-3394.8	596.583	84.3298	568.762	295.704	TRUE	FALSE	<Null>
E-74	-107.215	-14.2612	11.0345	<Null>	flank scar/eroded surface	flank scar/eroded surface	y	n	2	N/A	-3669.52	-3607.33	-3585.52	-3742.39	84.6683	40.7001	131.57	48.1698	TRUE	FALSE	<Null>
E-75	-28.2916	33.1471	43.0114	<Null>	flank scar/eroded surface	flank scar/eroded surface	n	n	2	N/A	-3092.11	-2929.78	-2565.38	-3391.47	308.792	60.0709	498.767	444.454	TRUE	FALSE	<Null>
E-76	-156.83	49.2942	18.0585	<Null>	flank scar/eroded surface	flank scar/eroded surface	n	n	2	N/A	-4839.89	-4764.14	-4721.42	-4940.62	205.913	8.21559	182.044	185.357	TRUE	FALSE	<Null>
E-77	144.077	-11.7786	14.9271	<Null>	flank scar/eroded surface	flank scar/eroded surface	n	n	2	N/A	-493.922	-291.031	-192.984	-721.75	462.395	102.731	228.37	501.755	TRUE	FALSE	<Null>
E-78	-18.7831	41.9262	8.74548	<Null>	flank scar/eroded surface	flank scar/eroded surface	n	n	2	N/A	-4791.16	-4651.34	-4617.73	-4883.92	138.021	35.3925	120.953	121.858	TRUE	FALSE	<Null>
E-79	166.047	39.4436	5.33362	<Null>	flank scar/eroded surface	flank scar/eroded surface	n	n	2	N/A	-4645.05	-4575.08	-4571.56	-4674.56	225.34	19.2064	124.504	287.831	TRUE	FALSE	<Null>
E-8	-172.009	-18.6377	16.2764	<Null>	flank scar/eroded surface	flank scar/eroded surface	y	p	7	N/A	-2806.5	-3287.36	-3069.11	-3138.89	1312.31	136.631	947.735	1350.74	TRUE	FALSE	intraplate
E-80	112.979	-36.8924	28.4245	<Null>	flank scar/eroded surface	flank scar/eroded surface	n	n	2	N/A	-5369.83	-4896.58	-4879.75	-5613.62	339.793	422.612	518.838	209.252	TRUE	FALSE	<Null>
E-81	-158.246	24.6247	4.32672	<Null>	flank scar/eroded surface	flank scar/eroded surface	y	n	2	N/A	-4510.97	-4485.95	-4468.56	-4561.28	129.547	20.1257	122.779	119.7	TRUE	FALSE	<Null>
E-82	177.586	21.6211	4.32509	<Null>	flank scar/eroded surface	flank scar/eroded surface	y	n	2	N/A	-2376.61	-2302.06	-2260.03	-2468.83	176.389	12.402	136.624	184.326	TRUE	FALSE	<Null>
E-83	-117.463	21.4646	4.32509	<Null>	flank scar/eroded surface	flank scar/eroded surface	y	n	2	N/A	-3919.8	-3869.66	-3822.14	-3966.77	175.818	61.2577	177.934	130.403	TRUE	FALSE	<Null>
E-84	-157.969	24.2242	4.3263	<Null>	flank scar/eroded surface	flank scar/eroded surface	y	n	2	N/A	-4100.58	-4028.61	-4025.19	-4187.98	187.227	11.7588	118.605	219.46	TRUE	FALSE	<Null>
E-85	-143.22	26.8746	4.32805	<Null>	flank scar/eroded surface	flank scar/eroded surface	y	n	2	N/A	-4804.3	-4707	-4705.53	-4850.14	84.7995	14.5065	124.337	50.3286	TRUE	FALSE	<Null>
E-86	-176.968	15.9118	5.61931	<Null>	flank scar/eroded surface	flank scar/eroded surface	n	n	2	N/A	-4905	-4877.12	-4866.2	-4893.2	205.167	6.80877	136.217	267.379	TRUE	FALSE	<Null>
E-87	-118.374	13.2772	4.32153	<Null>	flank scar/eroded surface	flank scar/eroded surface	n	n	2	N/A	-3783.41	-3679.81	-3663.78	-3888.08	149.157	53.262	128.162	131.061	TRUE	FALSE	<Null>
E-88	-166.578	20.5447	4.3247	<Null>	flank scar/eroded surface	flank scar/eroded surface	y	n	2	N/A	-4881.66	-4840.89	-4801.61	-4949.08	111.388	8.87256	45.6493	172.568	TRUE	FALSE	<Null>
E-89	-173.924	-41.1076	7.65019	<Null>	flank scar/eroded surface	flank scar/eroded surface	n	n	2	N/A	-3140.86	-3077.75	-3039.95	-3224.88	88.8911	7.62807	66.1328	94.5284	TRUE	FALSE	<Null>
E-9	-13.9026	39.3272	23.7547	<Null>	flank scar/eroded surface	flank scar/eroded surface	n	p	6	N/A	-3907.92	-4028.56	-3970.55	-4019.23	578.654	76.3941	441.601	676.708	TRUE	FALSE	intraplate
E-90	-34.8428	37.9385	20.7274	<Null>	flank scar/eroded surface	flank scar/eroded surface	n	n	2	N/A	-3231.47	-3469.58	-2967.17	-3321.27	596.626	139.205	354.368	665.555	TRUE	FALSE	<Null>
E-91	-112.725	11.7421	6.85745	<Null>	flank scar/eroded surface	flank scar/eroded surface	y	n	2	N/A	-3892.28	-3840.19	-3833.09	-3984.62	110.959	26.7943	117.464	67.7118	TRUE	FALSE	<Null>
E-92	-27.1299	18.5939	9.60579	<Null>	flank scar/eroded surface	flank scar/eroded surface	n	n	2	N/A	-4316.81	-4222.7	-4220.11	-4382.83	74.8882	25.7832	85.3264	60.7234	TRUE	FALSE	<Null>
E-93	-174.071	25.6979	6.89556	<Null>	flank scar/eroded surface	flank scar/eroded surface	y	n	2	N/A	-2926.28	-2851.41	-2821.91	-3022.73	64.5224	6.06403	78.0198	73.4182	TRUE	FALSE	<Null>
E-94	-162.072	-0.398432	7.34274	<Null>	flank scar/eroded surface	flank scar/eroded surface	y	n	2	N/A	-5232.72	-5197.19	-5187.31	-5238.83	43.2223	12.6218	38.0197	53.1288	TRUE	FALSE	<Null>
E-95	-91.653	1.58789	6.047	<Null>	flank scar/eroded surface	flank scar/eroded surface	y	n	2	N/A	-2071.36	-2091.91	-1990.2	-2123.34	48.6217	4.49555	69.2356	53.0952	TRUE	FALSE	<Null>
E-96	-110.753	19.5812	32.0007	<Null>	flank scar/eroded surface	flank scar/eroded surface	y	n	2	N/A	-2709.11	-2404.14	-2299.61	-2818.38	917.693	303.627	821.02	927.603	TRUE	FALSE	<Null>
E-97	-124.503	-17.3123	9.07891	<Null>	flank scar/eroded surface	flank scar/eroded surface	y	n	2	N/A	-3039.66	-2915.73	-2867.8	-3260.88	138.585	19.5378	122.691	159.828	TRUE	FALSE	<Null>
E-98	-153.9	11.5961	9.65207	<Null>	flank scar/eroded surface	flank scar/eroded surface	y	n	2	N/A	-5266.22	-5169.06	-5161.86	-5326.11	65.0032	51.3772	71.8516	86.956	TRUE	FALSE	<Null>
E-99	-88.6156	10.9647	8.24324	<Null>	flank scar/eroded surface	flank scar/eroded surface	y	n	2	N/A	-3077.53	-3019.53	-3001.08	-3088.45	78.002	24.2248	48.3436	105.053	TRUE	FALSE	<Null>
SCD-0001	-174.97	-18.7252	7.87443	5	caldera	horse-shoe/eroded caldera	y	n	6	1	-1604.47	-1426.38	-1417.02	-1680.27	72.6819	10.8779	87.5204	98.2087	TRUE	FALSE	volcanic arc
SCD-0002	-98.4517	10.6053	7.85072	3.5	caldera	full caldera	y	n	4	2	-2853.3	-2579.33	-2468.69	-3199.92	153.506	23.7178	113.935	184.745	TRUE	FALSE	intraplate
SCD-0003	-132.158	42.3568	4.55607	3.5	caldera	horse-shoe/eroded caldera	y	n	4	1	-3501.22	-3395.16	-3363.67	-3568.3	147.27	44.4256	103.769	192.462	TRUE	FALSE	intraplate
SCD-0004	-150.383	54.8653	4.34852	3.8	caldera	full caldera	n	n	4	6	-3886.23	-3802.94	-3776.31	-3892.3	94.4025	5.32645	67.3591	134.95	TRUE	FALSE	intraplate
SCD-0005	-89.6641	9.64653	6.72195	4	caldera	horse-shoe/eroded caldera	y	n	4	1	-3438.22	-3378.92	-3327.44	-3510.95	89.3886	19.3377	160.237	49.4133	TRUE	FALSE	intraplate
SCD-0006	125.443	2.703	15.0659	13	caldera	horse-shoe/eroded caldera	n	p	19	4	92.9219	-241.844	-53.7656	-107.094	416.872	69.3308	202.664	518.199	TRUE	FALSE	volcanic arc
SCD-0007	-175.642	-15.604	8.04882	5.5	caldera	full caldera	n	p	9	4	-96.9062	13.2344	66.6719	-466.734	153.546	5.07365	35.3863	127.619	TRUE	FALSE	volcanic arc
SCD-0008	8.78995	-47.9498	10.4972	15	caldera	full caldera	n	p	7	2	-1377.97	-1717.59	-1414.55	-1593.25	183.787	38.1247	144.63	223.484	TRUE	FALSE	intraplate
SCD-0009	-143.815	-7.19016	5.09698	5	caldera	horse-shoe/eroded caldera	y	p	4	2	-3428.8	-3542.27	-3441.92	-3508.66	246.13	13.8612	149.353	294.935	TRUE	FALSE	intraplate
SCD-0010	-172.637	-9.90567	5.80195	4.9	caldera	horse-shoe/eroded caldera	y	n	4	1	-3739.11	-3794	-3754.72	-3768.77	45.3921	0	30.6459	51.0676	TRUE	FALSE	intraplate
SCD-0011	-125.401	36.7807	6.15863	7	caldera	full caldera	y	p	4	2	-3059.44	-3020.86	-2996.25	-3343.08	71.5945	9.20914	27.971	146.148	TRUE	FALSE	intraplate
SCD-0012	-147.954	-17.4796	26.4789	7.5	caldera	full caldera	y	n	19	1	-3702.94	-3476.19	-3410.77	-3831.11	251.938	34.0587	152.869	255.157	TRUE	FALSE	intraplate
SCD-0013	-174.005	-15.3576	14.8779	9.75	caldera	horse-shoe/eroded caldera	y	n	17	2	-1967.81	-1797.25	-1522.19	-2227.77	192.014	22.7349	158.956	172.16	TRUE	FALSE	volcanic arc
SCD-0014	161.983	23.4637	8.53277	6.1	caldera	horse-shoe/eroded caldera	n	n	15	1	-5252	-5239.23	-5086.56	-5372.52	118.178	10.9012	62.5752	86.7536	TRUE	FALSE	intraplate
SCD-0015	-95.9786	8.23839	9.67507	5.5	caldera	horse-shoe/eroded caldera	n	n	12	1	-3648.59	-3785.42	-3438.92	-3737.42	62.3605	64.6125	180.127	42.7028	TRUE	FALSE	intraplate
SCD-0016	-136.362	34.9903	8.30245	5.5	caldera	horse-shoe/eroded caldera	y	n	10	2	-3777.81	-3321.41	-3317.39	-4042.92	160.508	26.9489	220.301	184.933	TRUE	FALSE	intraplate
SCD-0017	-138.49	-29.037	6.89719	5.5	caldera	horse-shoe/eroded caldera	n	n	9	1	-4063.55	-3858.39	-3846.86	-4144.81	147.454	24.0011	94.6445	188.039	TRUE	FALSE	intraplate
SCD-0018	-168	0.366979	8.74997	2.7	caldera	full caldera	y	n	9	1	-4972.91	-4764.2	-4703.33	-5112.73	142.373	128.711	143.544	183.794	TRUE	FALSE	intraplate
SCD-0019	-146.788	25.4086	12.3266	8.2	caldera	horse-shoe/eroded caldera	n	n	8	2	-5014.25	-4936.06	-4739.83	-5195.28	163.117	100.795	253.439	78.6274	TRUE	FALSE	intraplate
SCD-0020	-140.827	-2.10961	10.2222	7	caldera	horse-shoe/eroded caldera	y	n	8	1	-4293.06	-4203.89	-4189.67	-4369.88	47.6501	32.3898	73.7483	85.3695	TRUE	FALSE	intraplate
SCD-0021	-134.839	39.5137	10.7475	4.5	caldera	horse-shoe/eroded caldera	y	n	8	1	-4625.02	-4372.84	-4366.61	-4791.45	226.568	26.6583	156.5	277.288	TRUE	FALSE	intraplate
SCD-0022	-161.276	25.3025	5.46399	4	caldera	horse-shoe/eroded caldera	y	n	7	1	-4893.75	-4940.67	-4868.45	-4950.67	78.7355	22.4855	43.0933	49.9146	TRUE	FALSE	intraplate
SCD-0023	-169.071	25.9789	5.8562	5.2	caldera	horse-shoe/eroded caldera	y	n	6	1	-4044.12	-3951.92	-3931.02	-4102.67	126.714	30.3157	111.28	94.2488	TRUE	FALSE	intraplate
SCD-0024	-105.784	9.23606	6.69552	4	caldera	horse-shoe/eroded caldera	n	n	6	1	-3220.61	-3130.53	-3088.98	-3310.03	53.7362	29.4486	103.243	34.6901	TRUE	FALSE	divergent
SCD-0025	-130.392	45.3416	8.06902	5	caldera	horse-shoe/eroded caldera	y	n	6	1	-2375.86	-2223.58	-2121.16	-2440.23	100.765	36.3936	151.551	157.374	TRUE	FALSE	divergent
SCD-0026	-85.4479	-2.27707	12.0736	5	caldera	full caldera	n	n	6	2	-2702.58	-2354.81	-2224.77	-2864.16	165.713	295.573	245.535	131.977	TRUE	FALSE	intraplate
SCD-0027	-176.912	-24.5897	13.5706	6.1	caldera	full caldera	n	n	6	3	-1125.48	-938.438	-901.219	-1235.14	114.238	152.494	150.627	126.51	TRUE	FALSE	volcanic arc
SCD-0028	-148.259	54.4611	13.0215	6.2	caldera	full caldera	y	n	5	1	-3565.11	-3301.48	-3293.34	-3701.98	168.175	21.5711	104.121	250.79	TRUE	FALSE	intraplate
SCD-0029	161.013	23.2558	7.95602	4.9	caldera	horse-shoe/eroded caldera	y	n	5	1	-5280.48	-5150.84	-5087.73	-5371.77	128.76	12.0652	83.3427	147.493	TRUE	FALSE	intraplate
SCD-0030	148.229	-4.09697	19.1163	12	caldera	horse-shoe/eroded caldera	n	n	5	3	-1269.84	-1180.34	-1007.5	-1518.5	192.518	78.0036	211.543	224.602	TRUE	FALSE	intraplate
SCD-0031	-139.09	-28.6823	7.57602	3.9	caldera	horse-shoe/eroded caldera	n	n	4	1	-3541.11	-3402.36	-3379.03	-3685.94	154.688	61.5646	76.4975	231.012	TRUE	FALSE	intraplate
SCD-0032	-173.611	-10.1621	7.34787	3.5	caldera	horse-shoe/eroded caldera	y	n	4	1	-3999	-3947.02	-3945.8	-4018.67	64.4874	17.1159	54.9099	90.9404	TRUE	FALSE	intraplate
SCD-0033	-170.773	-11.4042	5.03361	3.5	caldera	horse-shoe/eroded caldera	y	n	4	1	-4840.61	-4808.88	-4742.94	-4916.36	76.8254	43.8333	118.894	40.1899	TRUE	FALSE	intraplate
SCD-0034	147.158	-2.96593	11.6494	6.3	caldera	horse-shoe/eroded caldera	n	n	3	3	-1082.02	-908.219	-886.125	-1198.06	83.724	47.7187	98.7774	187.688	TRUE	FALSE	divergent
SCD-0035	-95.7617	5.48104	4.60762	2.9	caldera	horse-shoe/eroded caldera	y	n	3	1	-3595.09	-3530.44	-3530.27	-3653.94	69.7952	12.2779	74.8589	39.1108	TRUE	FALSE	intraplate
SCD-0036	-136.54	-9.73785	9.66527	4	caldera	horse-shoe/eroded caldera	n	n	3	1	-4211.69	-4147.09	-4076.72	-4271.08	87.7217	85.2829	105.416	55.3611	TRUE	FALSE	intraplate
SCD-0037	-137.036	52.5796	4.34676	4	caldera	horse-shoe/eroded caldera	y	n	3	1	-3494.95	-3457.08	-3373.14	-3515.73	21.7338	37.2988	71.3635	8.66069	TRUE	FALSE	intraplate
SCD-0038	176.262	26.3582	7.08569	4.5	caldera	horse-shoe/eroded caldera	y	n	3	1	-5573.44	-5585.16	-5505.56	-5723.2	138.277	25.2971	148.616	135.735	TRUE	FALSE	intraplate
SCD-0039	-139.4	55.3803	5.68149	6.6	caldera	horse-shoe/eroded caldera	y	n	3	1	-3262.48	-3246.56	-3226.06	-3284.08	12.581	5.07098	23.0264	9.63604	TRUE	FALSE	intraplate
SCD-0040	-144.129	50.4556	5.30085	3.5	caldera	horse-shoe/eroded caldera	y	n	3	1	-4042.92	-3998.44	-3965.94	-4068.48	31.3036	46.2952	51.4681	11.3729	TRUE	FALSE	intraplate
SCD-0041	158.948	23.9329	21.9736	19	caldera	horse-shoe/eroded caldera	n	n	3	2	-3834.77	-3967.25	-3534.19	-4211.78	949.906	35.2256	652.715	954.456	TRUE	FALSE	intraplate
SCD-0042	-138.264	32.149	6.00202	3	caldera	horse-shoe/eroded caldera	y	n	2	1	-4544.55	-4457.64	-4404.53	-4628.64	67.2453	45.2532	70.859	112.411	TRUE	FALSE	intraplate
SCD-0043	-28.2952	-59.6846	19.148	15.6	caldera	full caldera	n	n	2	1	-1467.69	-1247.02	-1104.88	-1675.36	308.715	231.695	390.568	296.851	TRUE	FALSE	volcanic arc
SCD-0044	-28.2555	-8.91588	4.75234	3.4	caldera	horse-shoe/eroded caldera	n	n	2	1	-5509.33	-5526.19	-5492.81	-5555.11	48.4523	2.99413	50.9319	43.3006	TRUE	FALSE	intraplate
SCD-0045	143.547	12.7175	9.60128	4.3	caldera	full caldera	y	n	2	1	-2965.16	-2713.83	-2710.48	-3179.97	189.021	119.09	128.456	187.682	TRUE	FALSE	volcanic arc
SCD-0046	118.721	13.3499	8.64316	6	caldera	horse-shoe/eroded caldera	y	n	2	1	-3325.72	-3173.22	-3126.58	-3380.12	88.7577	58.0071	155.841	66.7	TRUE	FALSE	intraplate
SCD-0047	125.55	16.838	5.6478	5.8	caldera	horse-shoe/eroded caldera	n	p	3	1	-2546.55	-2599.2	-2586.75	-2597.45	70.504	5.28908	39.8195	140.863	TRUE	FALSE	intraplate
SCD-0048	-176.597	-15.102	5.44496	4	caldera	full caldera	n	p	3	3	-305	-862.516	-254.625	-481.891	113.484	8.5385	151.068	133.579	TRUE	FALSE	volcanic arc
SCD-0049	-90.0139	1.78475	5.44125	3.6	caldera	full caldera	y	p	2	3	-991.828	-1035.53	-882.125	-1137.66	187.093	11.9634	124.692	207.849	TRUE	FALSE	divergent
SCD-0050	-90.9276	3.07303	6.52963	6	caldera	horse-shoe/eroded caldera	n	p	2	2	-1525.64	-1852.97	-1540.64	-1593.45	200.121	20.9702	211.377	211.956	TRUE	FALSE	divergent
SCD-0051	-149.179	28.3084	4.32915	4.2	caldera	full caldera	y	p	2	2	-4353.75	-4537	-4355.61	-4544.95	182.225	0	95.5636	254.529	TRUE	FALSE	intraplate
SCD-0052	163.399	-2.88345	6.52963	5	caldera	horse-shoe/eroded caldera	n	p	2	1	-3601.72	-3840.47	-3650.53	-3658.25	83.2133	6.86014	61.3591	105.353	TRUE	FALSE	intraplate
SCD-0053	-157.573	-15.7066	5.44537	5	caldera	horse-shoe/eroded caldera	n	p	2	2	-3755.11	-3791.89	-3765.02	-3898.95	249.926	5.42597	129.211	314.999	TRUE	FALSE	intraplate
SCD-0054	-173.903	-16.2184	5.99007	4.7	caldera	horse-shoe/eroded caldera	n	p	2	3	-521.531	-654.234	-476.969	-654.375	115.674	13.9169	102.516	110.784	TRUE	FALSE	volcanic arc
SCD-0055	-163.506	32.5719	7.36378	6.1	caldera	horse-shoe/eroded caldera	y	p	2	2	-4202.19	-4359.92	-4226.12	-4331.97	308.621	18.3706	190.034	425.853	TRUE	FALSE	intraplate
SCD-0056	175.049	-8.56833	6.48031	6	caldera	horse-shoe/eroded caldera	y	p	2	2	-4200.78	-4304.78	-4222.02	-4316.83	203.379	4.4912	92.4134	257.395	TRUE	FALSE	intraplate
SCD-0057	-166.156	1.00899	5.33799	1.78	crater/small caldera	horse-shoe/eroded crater/small caldera	y	n	5	1	-4960.89	-4758.59	-4746.45	-5138.06	129.837	1.49707	90.409	186.46	TRUE	FALSE	intraplate
SCD-0058	-140.194	49.1173	4.34408	1.86	crater/small caldera	full crater/small caldera	y	n	4	1	-3951.95	-3898.88	-3880.5	-3985.28	36.7515	46.6943	35.2947	33.8464	TRUE	FALSE	intraplate
SCD-0059	-156.138	-25.1748	5.81074	3	crater/small caldera	horse-shoe/eroded crater/small caldera	n	n	4	1	-4742.78	-4649.12	-4644.91	-4813.19	76.875	46.7037	78.3425	67.8141	TRUE	FALSE	intraplate
SCD-0060	-103.434	13.0979	6.7969	2.15	crater/small caldera	full crater/small caldera	y	n	13	1	-2791.52	-2651.44	-2627.56	-2867.31	193.265	24.662	92.739	307.778	TRUE	FALSE	divergent
SCD-0061	-135.449	51.4255	6.73421	2.7	crater/small caldera	full crater/small caldera	y	n	12	1	-3403.5	-3215.97	-3186.98	-3507.95	165.116	32.8162	116.983	149.056	TRUE	FALSE	intraplate
SCD-0062	-141.085	50.2894	5.36257	2.6	crater/small caldera	full crater/small caldera	y	n	7	1	-3841.27	-3745.5	-3723.2	-3888.83	71.1054	11.718	27.5024	129.238	TRUE	FALSE	intraplate
SCD-0063	-90.5669	8.29715	5.27026	2.6	crater/small caldera	horse-shoe/eroded crater/small caldera	y	n	6	1	-3373.53	-3330.25	-3317.58	-3393.78	30.4897	8.92503	42.2514	23.8232	TRUE	FALSE	intraplate
SCD-0064	-108.755	23.0415	8.30089	2.3	crater/small caldera	horse-shoe/eroded crater/small caldera	y	n	6	2	-2337.84	-2024.62	-2016.53	-2574.88	265.023	47.6168	114.787	326.142	TRUE	FALSE	divergent
SCD-0065	-133.301	49.3642	5.53097	1.9	crater/small caldera	full crater/small caldera	y	n	6	1	-2989.81	-2869.06	-2799.78	-3198.66	97.1191	43.2337	66.8535	96.0166	TRUE	FALSE	intraplate
SCD-0066	-135.168	29.3141	4.32979	1.72	crater/small caldera	full crater/small caldera	y	n	4	1	-4329.36	-4228.95	-4181.14	-4410.48	80.3923	30.099	61.6527	80.5021	TRUE	FALSE	intraplate
SCD-0067	-132.789	27.445	4.32852	2	crater/small caldera	horse-shoe/eroded crater/small caldera	y	n	4	1	-4425.58	-4304	-4302.12	-4481.64	87.2906	56.5332	66.7784	70.172	TRUE	FALSE	intraplate
SCD-0068	-142.547	-26.2855	4.32785	1.8	crater/small caldera	horse-shoe/eroded crater/small caldera	n	n	3	1	-3889.39	-3752.2	-3745.36	-3953.36	67.7847	34.172	71.8528	68.0915	TRUE	FALSE	<Null>
SCD-0069	-174.053	-9.38052	6.74796	2.4	crater/small caldera	full crater/small caldera	y	n	3	1	-4145.81	-4119.86	-4058.3	-4189.88	89.3305	37.6675	80.3953	89.0189	TRUE	FALSE	<Null>
SCD-0070	-118.5	13.106	4.60957	2.5	crater/small caldera	full crater/small caldera	n	n	3	1	-3772.7	-3669.42	-3629.97	-3966.16	93.8347	5.52496	53.2221	100.705	TRUE	FALSE	<Null>
SCD-0071	163.733	18.1515	4.61167	2.5	crater/small caldera	horse-shoe/eroded crater/small caldera	n	n	3	1	-5119.03	-5061.97	-5047.91	-5165.62	42.4544	11.2402	63.5019	27.3847	TRUE	FALSE	<Null>
SCD-0072	-161.95	24.7126	4.32687	2.6	crater/small caldera	horse-shoe/eroded crater/small caldera	y	n	2	1	-4960.23	-4932	-4921.22	-4970.98	13.6871	3.87298	24.357	18.4395	TRUE	FALSE	<Null>
SCD-0073	-164.641	21.3941	4.32522	1.5	crater/small caldera	horse-shoe/eroded crater/small caldera	y	n	2	1	-4465.39	-4330.06	-4326.75	-4687.11	194.278	43.3596	149.382	91.7825	TRUE	FALSE	<Null>
SCD-0074	-141.555	29.949	4.76315	1.1	crater/small caldera	full crater/small caldera	y	n	2	1	-4710.31	-4618.52	-4577	-4816.19	54.1346	24.4176	30.7205	63.2813	TRUE	FALSE	<Null>
SCD-0075	-119.629	13.6775	6.91445	1.5	crater/small caldera	horse-shoe/eroded crater/small caldera	n	n	2	1	-4172.84	-4079.72	-4021.23	-4243.22	62.971	51.5923	49.1906	75.6289	TRUE	FALSE	<Null>
SCD-0076	-110.954	19.2536	4.32397	1.4	crater/small caldera	full crater/small caldera	y	n	2	1	-2364.64	-2365.47	-2313.78	-2433.8	82.7699	27.1011	33.5315	157.129	TRUE	FALSE	<Null>
SCD-0077	-141.137	53.7278	4.34761	2.7	crater/small caldera	horse-shoe/eroded crater/small caldera	y	n	2	1	-3728.95	-3711.56	-3688.78	-3745.23	14.4627	17.5694	21.7948	24.0389	TRUE	FALSE	<Null>
SCD-0078	-131.043	41.3045	4.33837	2.4	crater/small caldera	full crater/small caldera	y	p	2	2	-1900.27	-1936.38	-1826.72	-2137.91	119.291	24.114	88.318	118.221	TRUE	FALSE	<Null>
U-1	-129.24	32.6155	6.60466	<Null>	undefined	undefined	n	p	5	N/A	-4470.14	-4623.86	-4522.17	-4570.2	94.5375	19.7499	48.0906	179.648	TRUE	FALSE	intraplate
U-10	-17.5564	36.4251	10.1935	<Null>	undefined	undefined	n	p	8	N/A	-5137.98	-5229.03	-5174	-5176.66	81.7046	1.08928	43.2941	110.873	TRUE	FALSE	intraplate
U-100	-146.248	-26.3852	176.471	<Null>	undefined	undefined	n	n	3	N/A	-3337.03	-3260.47	-2921.02	-3856.33	969.216	75.3421	967.998	653.736	TRUE	FALSE	<Null>
U-101	179.974	48.5688	9.13105	<Null>	undefined	undefined	n	n	3	N/A	-3196.69	-4364.25	-3238.55	-3808.83	2481.02	35.6028	2265.6	2481.59	TRUE	FALSE	<Null>
U-102	-16.6565	-62.7607	19.2186	<Null>	undefined	undefined	n	n	3	N/A	-4889.94	-4925.69	-4783.56	-4961.12	60.6944	23.436	108.873	59.4481	TRUE	FALSE	<Null>
U-103	10.5767	-62.7017	13.8948	<Null>	undefined	undefined	n	n	3	N/A	-4785.25	-4750.17	-4747.36	-4809.7	24.4681	3.03395	14.5069	42.8426	TRUE	FALSE	<Null>
U-104	157.881	-11.0502	36.963	<Null>	undefined	undefined	n	n	3	N/A	-2506.41	-2351.83	-2290	-2589.86	293.325	19.4603	200.379	342.3	TRUE	FALSE	<Null>
U-105	11.218	-49.5769	20.0779	<Null>	undefined	undefined	n	n	3	N/A	-3919.56	-3833.39	-3825.95	-3959.08	209.966	22.7566	164.555	188.157	TRUE	FALSE	<Null>
U-106	-147.545	51.4474	17.6016	<Null>	undefined	undefined	n	n	3	N/A	-4506.5	-4469.62	-4460.33	-4520.42	55.6732	16.3215	34.2459	36.2202	TRUE	FALSE	<Null>
U-107	-28.3879	-9.80565	8.21522	<Null>	undefined	undefined	n	n	3	N/A	-5144.08	-5134.09	-5014.84	-5215.69	125.296	88.4878	88.9493	141.241	TRUE	FALSE	<Null>
U-108	-15.9152	-32.7111	23.3884	<Null>	undefined	undefined	n	n	3	N/A	-3477.39	-3293.38	-3271.42	-3658.98	306.82	28.9555	359.103	246.566	TRUE	FALSE	<Null>
U-109	-108.484	-31.9188	10.2605	<Null>	undefined	undefined	n	n	3	N/A	-3159.02	-3053.44	-3034.2	-3249.31	119.916	20.5418	81.6207	91.9974	TRUE	FALSE	<Null>
U-11	65.7518	1.96357	217.173	<Null>	undefined	undefined	n	p	8	N/A	-3382.22	-3107.19	-3057.41	-3130.95	306.238	204.891	475.405	571.596	TRUE	FALSE	divergent
U-110	-146.565	-10.8209	8.82304	<Null>	undefined	undefined	y	n	3	N/A	-5031.89	-4870.75	-4825.25	-5293.91	297.288	32.1082	61.3064	464.319	TRUE	FALSE	<Null>
U-111	-47.694	-57.7792	24.3553	<Null>	undefined	undefined	n	n	3	N/A	-2971.44	-2830	-2804.38	-3196.66	169.75	44.2232	222.573	147.014	TRUE	FALSE	<Null>
U-112	-163.817	-70.1031	37.5047	<Null>	undefined	undefined	n	n	3	N/A	-4053.53	-3971.02	-3921	-4108.83	70.5053	21.4049	68.9234	72.9661	TRUE	FALSE	<Null>
U-113	-157.281	-15.7736	12.1033	<Null>	undefined	undefined	n	n	3	N/A	-4586.98	-4261.62	-4253.34	-4687.94	136.626	115.791	262.513	227.053	TRUE	FALSE	<Null>
U-114	-65.0276	-56.8352	11.9297	<Null>	undefined	undefined	n	n	3	N/A	-3967.7	-3829.95	-3819.12	-4073.05	183.177	40.7854	137.979	169.668	TRUE	FALSE	<Null>
U-115	-152.419	-6.01837	61.411	<Null>	undefined	undefined	n	n	3	N/A	-4600.05	-4388.61	-3880.17	-4828.78	384.253	29.3261	478.448	394.394	TRUE	FALSE	<Null>
U-116	-107.341	-33.467	25.1275	<Null>	undefined	undefined	n	n	2	N/A	-3299.75	-3198.52	-3184.61	-3350.5	150.94	29.7589	80.3793	110.257	TRUE	FALSE	<Null>
U-117	-8.32957	-47.4888	14.4716	<Null>	undefined	undefined	y	n	2	N/A	-3273.98	-3221.52	-3142.53	-3326.16	98.0283	51.8155	88.4908	109.637	TRUE	FALSE	<Null>
U-118	74.2178	-17.4004	30.7833	<Null>	undefined	undefined	n	n	2	N/A	-4745.16	-4570.86	-4564.72	-4886.67	105.289	18.9678	84.5134	193.994	TRUE	FALSE	<Null>
U-119	173.957	-16.3202	85.0669	<Null>	undefined	undefined	n	n	2	N/A	-2939.06	-2886.64	-2608.27	-2863.55	377.23	135.533	320.15	235.989	TRUE	FALSE	<Null>
U-12	-137.192	-28.9927	14.9937	<Null>	undefined	undefined	n	p	7	N/A	-4099.3	-4145.73	-4107.34	-4108.36	16.1058	1.03444	9.46576	27.8014	TRUE	FALSE	intraplate
U-120	-128.203	-15.6112	8.21246	<Null>	undefined	undefined	n	n	2	N/A	-3937.64	-3909.66	-3887.3	-4001.19	110.203	5.09049	104.25	40.5439	TRUE	FALSE	<Null>
U-121	-1.81942	-53.7015	60.7338	<Null>	undefined	undefined	n	n	2	N/A	-2618.42	-2419.95	-2288.55	-2519.08	234.979	93.1367	201.248	296.172	TRUE	FALSE	<Null>
U-122	-36.2271	57.4729	63.1592	<Null>	undefined	undefined	y	n	2	N/A	-2753.73	-2694.41	-2519.67	-2782.34	183.739	68.1212	129.535	222.196	TRUE	FALSE	<Null>
U-123	-11.9784	0.714699	50.2573	<Null>	undefined	undefined	n	n	2	N/A	-4311.12	-4326.92	-4156.48	-4519.19	283.357	124.925	262.981	350.79	TRUE	FALSE	<Null>
U-124	10.6085	-51.3324	29.5371	<Null>	undefined	undefined	n	n	2	N/A	-3707.52	-3633.05	-3610.16	-3772.33	42.0115	12.8858	56.4644	40.594	TRUE	FALSE	<Null>
U-125	-41.9313	12.6825	41.0825	<Null>	undefined	undefined	n	n	2	N/A	-4497.91	-4291.44	-4145.92	-4746.12	332.639	34.1545	461.809	320.081	TRUE	FALSE	<Null>
U-126	-140.991	25.1746	5.99595	<Null>	undefined	undefined	n	n	2	N/A	-4758.47	-4682	-4677.95	-4805.78	50.522	15.2018	39.9599	51.79	TRUE	FALSE	<Null>
U-127	0.828459	-59.1094	27.2039	<Null>	undefined	undefined	n	n	2	N/A	-4730.88	-4595.58	-4519.7	-4969.81	260.155	33.37	158.881	282.25	TRUE	FALSE	<Null>
U-128	-138.165	49.7855	5.47316	<Null>	undefined	undefined	n	n	2	N/A	-4002.45	-3958.55	-3957.47	-3974.62	99.6834	1.5505	8.44091	69.4862	TRUE	FALSE	<Null>
U-129	-22.5679	58.3317	5.35095	<Null>	undefined	undefined	y	n	2	N/A	-3006.28	-2966.34	-2965.12	-2973.91	148.146	0.474959	6.62028	47.5725	TRUE	FALSE	<Null>
U-13	169.49	-25.6884	6.65989	<Null>	undefined	undefined	n	p	6	N/A	-2832.86	-2902.41	-2843	-2857.14	118.319	10.8206	86.887	134.627	TRUE	FALSE	intraplate
U-130	-93.4298	-13.7272	34.4597	<Null>	undefined	undefined	n	n	2	N/A	-3863.45	-3812.45	-3806.81	-3839.27	80.2819	8.59856	33.1313	79.9653	TRUE	FALSE	<Null>
U-131	-105.676	17.8441	12.6122	<Null>	undefined	undefined	y	n	2	N/A	-2809.8	-2912.44	-2605.41	-2993.47	293.656	89.4174	219.361	295.098	TRUE	FALSE	<Null>
U-132	-35.0544	52.1876	12.5425	<Null>	undefined	undefined	n	n	2	N/A	-3461.48	-3408.16	-3381.53	-3563.94	140.982	19.0486	90.9413	135.174	TRUE	FALSE	<Null>
U-133	-23.2109	47.423	9.84791	<Null>	undefined	undefined	n	n	2	N/A	-4051.86	-4036.08	-4026.92	-4038.47	78.7803	4.50106	52.0965	120.381	TRUE	FALSE	<Null>
U-134	168.604	-21.3867	8.64934	<Null>	undefined	undefined	n	n	2	N/A	-4080.41	-3782.61	-3658.31	-4207.59	563.392	50.9174	327.099	623.582	TRUE	FALSE	<Null>
U-135	-25.1817	40.0929	6.31449	<Null>	undefined	undefined	n	n	2	N/A	-2963.42	-2913.84	-2913.61	-3030.22	29.3118	2.40584	19.4049	44.7282	TRUE	FALSE	<Null>
U-136	177.337	-23.3466	15.3374	<Null>	undefined	undefined	n	n	2	N/A	-4389.2	-4357.47	-4355.58	-4412.77	34.963	3.96062	38.0636	40.8124	TRUE	FALSE	<Null>
U-137	-22.4608	43.3128	6.01381	<Null>	undefined	undefined	n	n	2	N/A	-2995.42	-2995.12	-2953.31	-3044.17	40.6962	1.79844	73.4753	58.9474	TRUE	FALSE	<Null>
U-138	-142.791	22.916	8.21919	<Null>	undefined	undefined	n	n	2	N/A	-5509.62	-5411.78	-5370.97	-5669.41	141.175	82.5291	166.691	166.073	TRUE	FALSE	<Null>
U-139	-161.619	-66.4352	46.6271	<Null>	undefined	undefined	n	n	2	N/A	-3884.23	-3707.16	-3651.7	-3936.48	266.575	120.969	265.76	257.568	TRUE	FALSE	<Null>
U-14	162.055	10.1874	19.5291	<Null>	undefined	undefined	n	p	6	N/A	-1865.77	-2279.48	-1923.77	-1928.34	343.114	37.237	258.001	468.376	TRUE	FALSE	intraplate
U-140	-152.475	51.8331	12.6049	<Null>	undefined	undefined	y	n	2	N/A	-4487.91	-4377.91	-4341.7	-4628.45	224.922	64.8281	201.268	248.84	TRUE	FALSE	<Null>
U-141	-142.68	-7.04133	6.5303	<Null>	undefined	undefined	n	n	2	N/A	-4326.28	-4294.12	-4286.67	-4340.14	35.2511	5.61109	23.053	39.8406	TRUE	FALSE	<Null>
U-142	179.092	31.8933	12.5612	<Null>	undefined	undefined	y	n	2	N/A	-5051.27	-5070.12	-4954.97	-5097.53	103.982	33.0575	108.377	106.792	TRUE	FALSE	<Null>
U-143	155.037	31.9371	6.49745	<Null>	undefined	undefined	y	n	2	N/A	-4432.67	-4401.3	-4397.55	-4471.19	43.5783	6.01737	37.2911	65.5522	TRUE	FALSE	<Null>
U-144	-139.934	44.1657	4.34027	<Null>	undefined	undefined	n	n	2	N/A	-4328.28	-4288.28	-4278.41	-4354.66	31.0481	12.5654	51.513	9.5332	TRUE	FALSE	<Null>
U-145	-130.782	20.5016	6.86308	<Null>	undefined	undefined	n	n	2	N/A	-4810.7	-4961.09	-4724.44	-4871.83	66.2952	252.241	63.0694	80.1634	TRUE	FALSE	<Null>
U-146	-114.202	-39.2404	24.1442	<Null>	undefined	undefined	n	n	2	N/A	-3110.38	-3051.77	-3019.53	-3182	60.8046	33.7527	72.8811	62.2083	TRUE	FALSE	<Null>
U-147	-32.9074	23.2263	13.608	<Null>	undefined	undefined	n	n	2	N/A	-5640.38	-5407.59	-5351.33	-5859.88	236.226	38.9361	231.495	170.358	TRUE	FALSE	<Null>
U-148	135.073	10.6035	4.32069	<Null>	undefined	undefined	n	n	2	N/A	-3888.53	-3866.94	-3855.61	-3915.66	26.8066	8.06976	39.4757	28.9494	TRUE	FALSE	<Null>
U-149	-100.827	10.1757	11.2336	<Null>	undefined	undefined	n	n	2	N/A	-3576.36	-3556.19	-3490.61	-3613.92	66.3437	18.2773	50.221	65.1161	TRUE	FALSE	<Null>
U-15	56.4953	15.8673	7.40329	<Null>	undefined	undefined	n	p	5	N/A	-3158.58	-3191.45	-3176.53	-3185.91	32.8043	1.85346	25.5086	36.8895	TRUE	FALSE	intraplate
U-150	99.8685	-47.8478	24.0448	<Null>	undefined	undefined	n	n	2	N/A	-3187.02	-3134.59	-3051.16	-3170.59	391.754	28.9616	395.308	345.867	TRUE	FALSE	<Null>
U-151	-30.0966	-47.6119	43.0796	<Null>	undefined	undefined	n	n	2	N/A	-4958.42	-5104.5	-4814.98	-4948.47	50.5182	19.037	125.345	136.526	TRUE	FALSE	<Null>
U-152	-157.137	-46.7371	17.0237	<Null>	undefined	undefined	n	n	2	N/A	-4926.33	-4867.05	-4849.88	-4963.98	88.1242	15.4226	90.4552	88.7157	TRUE	FALSE	<Null>
U-153	-171.512	19.1391	12.5391	<Null>	undefined	undefined	y	n	2	N/A	-2779.61	-2749.44	-2739.66	-2781.17	66.8224	6.26467	61.0538	64.2701	TRUE	FALSE	<Null>
U-154	-48.2811	-57.5901	41.3563	<Null>	undefined	undefined	n	n	2	N/A	-3553.36	-3411.88	-3382.88	-3622.53	372.275	10.2858	308.926	303.825	TRUE	FALSE	<Null>
U-155	-143.112	-0.281248	29.3699	<Null>	undefined	undefined	n	n	2	N/A	-4348.34	-4336.86	-4301.14	-4367.3	45.2929	7.84591	44.1991	46.9204	TRUE	FALSE	<Null>
U-156	122.543	-50.7164	46.0967	<Null>	undefined	undefined	n	n	2	N/A	-4065.44	-4056.28	-3863.39	-3954.88	304.477	23.1601	104.36	323.244	TRUE	FALSE	<Null>
U-157	-35.211	3.07796	9.79444	<Null>	undefined	undefined	n	n	2	N/A	-3708.59	-3677.53	-3662.86	-3774.67	69.5242	25.6643	88.8292	66.196	TRUE	FALSE	<Null>
U-158	144.346	7.85507	22.4478	<Null>	undefined	undefined	n	n	2	N/A	-3489.88	-3460.03	-3438.06	-3514.66	47.3328	12.4159	51.5112	52.9956	TRUE	FALSE	<Null>
U-159	-2.86842	-42.1123	29.2729	<Null>	undefined	undefined	n	n	2	N/A	-4274.5	-4225.97	-4214.39	-4346.45	102.171	44.7151	83.4778	111.823	TRUE	FALSE	<Null>
U-16	-23.365	34.5117	9.88226	<Null>	undefined	undefined	n	p	5	N/A	-4774.28	-5030.83	-4833.56	-4843.06	175.305	16.333	104.018	247.268	TRUE	FALSE	intraplate
U-160	-131.121	51.0301	26.1375	<Null>	undefined	undefined	y	n	2	N/A	-2628.14	-2575.67	-2540.27	-2611.52	112.686	18.7575	63.9583	144.954	TRUE	FALSE	<Null>
U-161	100.441	-48.0305	32.3368	<Null>	undefined	undefined	n	n	2	N/A	-2992.72	-2952.25	-2892.19	-3050.72	114.317	16.9706	106.632	111.399	TRUE	FALSE	<Null>
U-162	-1.80947	-16.1687	67.39	<Null>	undefined	undefined	n	n	2	N/A	-5091.77	-4953.47	-4832.17	-5027.67	284.543	47.7549	138.431	297.041	TRUE	FALSE	<Null>
U-163	64.7422	-3.13646	15.5492	<Null>	undefined	undefined	n	n	2	N/A	-4035.52	-3923.36	-3878.89	-4119.48	127.556	83.2172	123.85	221.483	TRUE	FALSE	<Null>
U-164	-126.441	-42.8648	38.9812	<Null>	undefined	undefined	n	n	2	N/A	-4644.12	-4563.06	-4561.64	-4654.34	54.7907	7.92913	45.3464	86.1478	TRUE	FALSE	<Null>
U-165	-170.736	17.1652	8.16854	<Null>	undefined	undefined	y	n	2	N/A	-5199.11	-5162.67	-5154.75	-5228.14	19.2574	11.4401	58.8799	20.713	TRUE	FALSE	<Null>
U-166	-99.1347	12.3404	33.9218	<Null>	undefined	undefined	y	n	2	N/A	-3472.52	-3425.78	-3414.97	-3479.31	56.3227	19.8545	56.4859	71.1042	TRUE	FALSE	<Null>
U-167	-140.088	3.26465	12.8961	<Null>	undefined	undefined	y	n	2	N/A	-4295.84	-4281.59	-4279.2	-4307.39	17.8651	2.7991	24.6698	12.6511	TRUE	FALSE	<Null>
U-168	21.21	-52.3259	53.1798	<Null>	undefined	undefined	n	n	2	N/A	-3227.89	-3085.33	-2901.06	-3231.92	181.266	122.734	344.432	224.865	TRUE	FALSE	<Null>
U-169	-127.566	-52.5619	24.0575	<Null>	undefined	undefined	n	n	2	N/A	-3884.3	-3845.06	-3814.17	-3912.61	89.8922	14.7922	88.9124	110.011	TRUE	FALSE	<Null>
U-17	-7.12467	-56.5626	9.96498	<Null>	undefined	undefined	n	p	5	N/A	-2751.91	-2861.58	-2760.89	-2794.95	77.4824	6.61155	44.4684	148.45	TRUE	FALSE	intraplate
U-170	-112.224	10.5758	12.5193	<Null>	undefined	undefined	y	n	2	N/A	-3871.23	-3789.92	-3766.8	-3893.47	131.261	16.897	71.0535	160.369	TRUE	FALSE	<Null>
U-171	-140.923	-51.7761	109.693	<Null>	undefined	undefined	n	n	2	N/A	-2942.2	-3723.12	6618.55	-3977.39	6439.15	131.246	16358.1	644.812	TRUE	FALSE	<Null>
U-172	-152.386	-31.6264	7.36289	<Null>	undefined	undefined	n	n	2	N/A	-5077.56	-5053.92	-5020.02	-5120.61	35.8281	6.51034	65.2075	36.2395	TRUE	FALSE	<Null>
U-173	-139.043	41.8021	25.166	<Null>	undefined	undefined	n	n	2	N/A	-4161.56	-4084.89	-4059.33	-4234.33	148.904	34.0973	162.19	93.9915	TRUE	FALSE	<Null>
U-174	-136.07	-22.3534	4.32561	<Null>	undefined	undefined	n	n	2	N/A	-3890.09	-3888.14	-3823.69	-3943.16	95.0674	29.4565	108.776	76.9379	TRUE	FALSE	<Null>
U-175	178.229	-33.7269	9.99234	<Null>	undefined	undefined	n	n	2	N/A	-1847.36	-1635.61	-1593.86	-1945.8	482.175	30.8907	211.837	514.983	TRUE	FALSE	<Null>
U-176	-135.047	-18.7713	7.78315	<Null>	undefined	undefined	n	n	2	N/A	-2518.31	-2429.55	-2427.11	-2569.11	166.806	28.23	72.3447	225.074	TRUE	FALSE	<Null>
U-177	-94.8233	7.26283	11.9144	<Null>	undefined	undefined	y	n	2	N/A	-3699.91	-3690.45	-3667.19	-3705.89	23.0947	9.4933	14.8133	19.101	TRUE	FALSE	<Null>
U-178	-125.811	33.8618	8.69948	<Null>	undefined	undefined	y	n	2	N/A	-4715.28	-4646.14	-4632.27	-4771.45	105.342	2.60928	24.3588	156.403	TRUE	FALSE	<Null>
U-179	173.216	18.2192	5.44674	<Null>	undefined	undefined	y	n	2	N/A	-3772.38	-3748.28	-3741.62	-3794.11	37.8837	12.8798	35.5244	40.3005	TRUE	FALSE	<Null>
U-18	64.9762	-6.40604	7.30441	<Null>	undefined	undefined	n	p	4	N/A	-3892.94	-4039.05	-3913.48	-3915.69	106.65	17.2947	70.1748	138.035	TRUE	FALSE	intraplate
U-180	-169.152	8.34081	75.7474	<Null>	undefined	undefined	n	n	2	N/A	-4895.66	-5193.25	-4876.03	-5129.58	362.759	26.1008	482.883	307.337	TRUE	FALSE	<Null>
U-181	178.323	-19.3689	6.91874	<Null>	undefined	undefined	y	n	2	N/A	-2637.38	-2612.19	-2593.88	-2666.72	121.437	14.4632	102.281	125.059	TRUE	FALSE	<Null>
U-182	-31.4287	5.95678	11.9719	<Null>	undefined	undefined	n	n	2	N/A	-3717.78	-3620.45	-3616.11	-3825.42	168.242	11.9032	153.466	187.388	TRUE	FALSE	<Null>
U-183	58.8799	8.28405	45.5359	<Null>	undefined	undefined	n	n	2	N/A	-2767.23	-2369.33	-2277.05	-3082.23	337.138	146.005	349.87	350.804	TRUE	FALSE	<Null>
U-184	57.2465	8.1885	9.79225	<Null>	undefined	undefined	n	p	3	N/A	-3500.75	-3528.66	-3513.5	-3550.23	73.6132	11.2322	55.3517	74.8243	TRUE	FALSE	<Null>
U-185	-33.6946	39.0509	10.2056	<Null>	undefined	undefined	n	p	3	N/A	-2941.45	-3013.8	-2945.53	-2988.58	127.379	17.4528	114.06	100.003	TRUE	FALSE	<Null>
U-186	-21.4062	48.5672	14.1178	<Null>	undefined	undefined	n	p	3	N/A	-4126.75	-4175.62	-4174.34	-4188.36	196.649	21.4938	130.263	175.097	TRUE	FALSE	<Null>
U-187	-22.4276	49.0922	9.38741	<Null>	undefined	undefined	n	p	3	N/A	-3853.92	-3929.44	-3868.78	-3869.28	92.9118	12.2358	58.9705	129.017	TRUE	FALSE	<Null>
U-188	-134.328	41.8557	8.3881	<Null>	undefined	undefined	n	p	3	N/A	-3614.38	-3663.77	-3610.67	-3632.17	92.6726	7.1997	70.7939	110.854	TRUE	FALSE	<Null>
U-189	150.2	4.14399	15.9617	<Null>	undefined	undefined	n	p	3	N/A	-3985.42	-4071.41	-4038.33	-4089.69	153.937	14.1981	92.4177	191.789	TRUE	FALSE	<Null>
U-19	-154.422	-21.9298	8.25175	<Null>	undefined	undefined	n	p	4	N/A	-4073.08	-4159	-4086.08	-4093.72	50.3185	4.39815	34.4031	89.4014	TRUE	FALSE	intraplate
U-190	-131.389	46.3309	6.65791	<Null>	undefined	undefined	n	p	3	N/A	-2644.02	-2710.25	-2647.45	-2666.58	44.6036	4.35172	29.1365	40.3511	TRUE	FALSE	<Null>
U-191	-23.2577	4.94268	9.36616	<Null>	undefined	undefined	n	p	3	N/A	-3964.89	-4034.67	-3975.14	-3988.81	86.6332	2.59841	58.117	95.6398	TRUE	FALSE	<Null>
U-192	-179.187	33.4609	207.109	<Null>	undefined	undefined	n	p	3	N/A	-3171.22	-4848.38	-3388.78	-3425.38	2223.38	71.3257	2463.14	1970.75	TRUE	FALSE	<Null>
U-193	-31.2244	5.90165	6.91159	<Null>	undefined	undefined	y	p	3	N/A	-3738.69	-3790.83	-3749.66	-3779.17	54.0118	2.86986	30.2051	97.1109	TRUE	FALSE	<Null>
U-194	178.399	-27.6863	6.79856	<Null>	undefined	undefined	n	p	3	N/A	-3155.62	-3184.22	-3120.12	-3213	46.6665	17.9204	73.2405	43.8406	TRUE	FALSE	<Null>
U-195	-33.8974	11.0083	10.658	<Null>	undefined	undefined	n	p	3	N/A	-5175.88	-5270.78	-5224.77	-5237.42	58.8689	3.53319	42.3869	114.343	TRUE	FALSE	<Null>
U-196	-34.2832	39.4946	6.00956	<Null>	undefined	undefined	n	p	2	N/A	-3490.31	-3523.38	-3503.72	-3512	66.1624	1.70935	37.7117	70.6233	TRUE	FALSE	<Null>
U-197	-33.3494	45.9155	9.84519	<Null>	undefined	undefined	n	p	2	N/A	-3730.11	-3757.08	-3739.52	-3740.88	40.5991	3.75127	27.2121	60.8265	TRUE	FALSE	<Null>
U-198	-91.2261	2.91302	6.52963	<Null>	undefined	undefined	y	p	2	N/A	-2313.17	-2388.38	-2330.19	-2333.19	31.3621	12.5244	30.8737	37.1205	TRUE	FALSE	<Null>
U-199	135.478	11.0562	6.29045	<Null>	undefined	undefined	y	p	2	N/A	-4273.52	-4344.42	-4303.2	-4304.52	79.9226	1.17	54.2872	80.0059	TRUE	FALSE	<Null>
U-2	-117.843	21.363	6.69091	<Null>	undefined	undefined	n	n	5	N/A	-3850.81	-3783.33	-3768.83	-3880.77	41.2575	72.0501	60.5304	40.969	TRUE	FALSE	intraplate
U-20	60.893	5.04363	10.1932	<Null>	undefined	undefined	n	p	4	N/A	-3119.5	-3193.75	-3133.98	-3147.09	155.092	21.8953	98.2003	199.397	TRUE	FALSE	intraplate
U-200	143.21	16.862	14.1597	<Null>	undefined	undefined	y	p	2	N/A	-1725.92	-1855.77	-1803.06	-1816.2	248.37	19.3041	149.255	361.327	TRUE	FALSE	<Null>
U-201	-34.7601	31.7138	7.63894	<Null>	undefined	undefined	n	p	2	N/A	-3691.67	-3721.5	-3696.61	-3700.69	64.1458	4.24264	47.6231	73.7195	TRUE	FALSE	<Null>
U-202	-113.673	6.9254	8.16297	<Null>	undefined	undefined	n	p	2	N/A	-3984.81	-4052.86	-4031.84	-4037	95.0998	14.9289	82.929	65.5899	TRUE	FALSE	<Null>
U-203	63.4301	5.19153	9.64908	<Null>	undefined	undefined	n	p	2	N/A	-3329.64	-3580.41	-3385.33	-3428.48	169.117	7.44295	134.352	181.648	TRUE	FALSE	<Null>
U-204	173.663	33.8306	9.03847	<Null>	undefined	undefined	n	p	2	N/A	-4196.38	-4275.39	-4216.14	-4231.23	168.151	6.84566	111.216	199.865	TRUE	FALSE	<Null>
U-205	-36.4979	24.1091	6.92253	<Null>	undefined	undefined	n	p	2	N/A	-5148.08	-5276.75	-5168.33	-5183.61	122.239	7.39299	71.2355	238.517	TRUE	FALSE	<Null>
U-206	-101.199	5.59759	6.04751	<Null>	undefined	undefined	n	p	2	N/A	-3146.66	-3162.75	-3138.97	-3174	14.568	1.85405	18.0797	12.8525	TRUE	FALSE	<Null>
U-207	3.29236	-60.493	10.9655	<Null>	undefined	undefined	n	p	2	N/A	-5338.75	-5374.3	-5348.14	-5350.78	40.515	3.82704	29.6088	36.2618	TRUE	FALSE	<Null>
U-208	-34.1209	29.3415	8.65926	<Null>	undefined	undefined	n	p	2	N/A	-4190.47	-4306.08	-4188.95	-4267.38	92.3952	10.3309	51.3987	178.018	TRUE	FALSE	<Null>
U-209	-23.9971	47.8607	5.64656	<Null>	undefined	undefined	n	p	2	N/A	-3844.31	-3967.42	-3851.25	-3869.97	136.782	26.1048	116.05	161.906	TRUE	FALSE	<Null>
U-21	-20.1662	46.1118	18.2788	<Null>	undefined	undefined	n	p	4	N/A	-4303.22	-4358.8	-4320.14	-4355.08	61.3039	16.9744	44.5193	110.046	TRUE	FALSE	intraplate
U-210	-165.208	41.9348	7.37589	<Null>	undefined	undefined	n	p	2	N/A	-5480.33	-5524.88	-5485.75	-5490.34	45.1847	4.2408	30.7759	54.5379	TRUE	FALSE	<Null>
U-211	-154.25	-22.1215	15.7881	<Null>	undefined	undefined	n	p	2	N/A	-4163.08	-4257.25	-4176.62	-4183.53	139.578	11.7978	106.361	164.446	TRUE	FALSE	<Null>
U-212	-10.2335	-29.0416	12.7285	<Null>	undefined	undefined	n	p	2	N/A	-3701.39	-3762.27	-3714.84	-3724.34	46.2174	11.1064	39.4328	40.4464	TRUE	FALSE	<Null>
U-213	-138.156	-4.94352	15.081	<Null>	undefined	undefined	n	p	2	N/A	-4217.75	-4314.64	-4232.22	-4240.27	82.3698	13.4599	76.0326	90.7905	TRUE	FALSE	<Null>
U-214	3.11296	78.3817	7.33476	<Null>	undefined	undefined	n	p	2	N/A	-2264.47	-2340.41	-2270.84	-2305.81	57.3852	2.95655	29.4004	104.889	TRUE	FALSE	<Null>
U-215	-25.2491	50.0123	19.7023	<Null>	undefined	undefined	n	p	2	N/A	-3434.91	-3520.03	-3486.62	-3495.05	198.052	15.001	142.259	180.619	TRUE	FALSE	<Null>
U-216	-23.1614	-63.1474	25.2499	<Null>	undefined	undefined	n	p	2	N/A	-4907.7	-4930.92	-4906.47	-4919.75	41.4177	12.893	30.1833	43.8021	TRUE	FALSE	<Null>
U-217	-21.1441	-9.92566	6.9128	<Null>	undefined	undefined	n	p	2	N/A	-4761.75	-4792.88	-4771.84	-4777.94	58.5056	6.43112	39.1005	90.0455	TRUE	FALSE	<Null>
U-218	-96.5556	11.5685	24.0011	<Null>	undefined	undefined	n	p	2	N/A	-4210.12	-4233.06	-4193.81	-4219.84	70.6062	17.3969	86.8229	110.781	TRUE	FALSE	<Null>
U-219	-128.91	24.6925	66.3605	<Null>	undefined	undefined	y	p	2	N/A	-4304.44	-4529.61	-4437.69	-4451.11	241.243	28.4169	92.8503	186.101	TRUE	FALSE	<Null>
U-22	166.39	17.395	12.3497	<Null>	undefined	undefined	n	p	4	N/A	-4938.78	-5131.48	-5016.31	-5032.05	335.448	9.69696	243.496	366.474	TRUE	FALSE	intraplate
U-220	135.616	9.61292	31.106	<Null>	undefined	undefined	n	p	2	N/A	-3504.97	-3758.27	-3529.86	-3594.16	465.197	94.0899	302.149	648.933	TRUE	FALSE	<Null>
U-221	-76.865	-32.628	20.5217	<Null>	undefined	undefined	n	p	2	N/A	-3998.19	-4155.14	-4053.81	-4067.45	103.106	6.69624	63.8492	83.9529	TRUE	FALSE	<Null>
U-222	-139.448	-33.7323	33.1426	<Null>	undefined	undefined	n	p	2	N/A	-4794.72	-4851.11	-4659.42	-4820.89	82.0942	18.9367	418.526	85.0338	TRUE	FALSE	<Null>
U-223	145.373	7.14933	122.09	<Null>	undefined	undefined	n	p	2	N/A	-2651.42	-3221.88	-2742.47	-2796.52	796.219	371.361	888.807	1110.51	TRUE	FALSE	<Null>
U-224	2.2305	-48.1071	5.21198	<Null>	undefined	undefined	n	p	2	N/A	-4229.17	-4265.2	-4236.53	-4249.2	21.0843	7.98862	18.0329	61.6074	TRUE	FALSE	<Null>
U-225	-166.063	2.14053	19.0043	<Null>	undefined	undefined	n	p	2	N/A	-5232.14	-5355.36	-5234.27	-5246.94	78.9349	4.47342	87.7531	101.161	TRUE	FALSE	<Null>
U-226	-1.0185	-42.9762	17.0118	<Null>	undefined	undefined	n	p	2	N/A	-4392.56	-4447.59	-4401.67	-4408.27	45.8117	7.45134	40.6767	49.8144	TRUE	FALSE	<Null>
U-227	-27.3889	36.9901	22.4033	<Null>	undefined	undefined	n	p	2	N/A	-1947.22	-2077.84	-1969.66	-2160.16	173.769	10.9533	129.485	268.341	TRUE	FALSE	<Null>
U-228	-165.926	33.9268	16.2435	<Null>	undefined	undefined	n	p	2	N/A	-5597.92	-5681.36	-5611.52	-5618.41	36.6948	4.85208	22.4444	56.8451	TRUE	FALSE	<Null>
U-229	-174.474	-21.8664	15.9584	<Null>	undefined	undefined	y	p	2	N/A	-4024.94	-4119.47	-4073.75	-4144.72	159.479	16.3554	101.082	327.39	TRUE	FALSE	<Null>
U-23	-36.4001	20.5154	9.15471	<Null>	undefined	undefined	n	p	4	N/A	-5250.14	-5359.94	-5266.8	-5303.17	99.1407	9.68548	69.8441	93.6504	TRUE	FALSE	intraplate
U-24	13.8553	-57.7654	11.6756	<Null>	undefined	undefined	n	p	4	N/A	-5381.31	-5553	-5451.69	-5504.53	193.205	2.3184	128.056	90.2682	TRUE	FALSE	intraplate
U-25	-157.973	6.95334	10.6667	<Null>	undefined	undefined	n	n	20	N/A	-4577.61	-4534.88	-4478.78	-4631.16	61.3516	44.5668	38.9429	62.102	TRUE	FALSE	intraplate
U-26	140.587	-44.0819	51.0029	<Null>	undefined	undefined	n	n	20	N/A	-4879.38	-4516.22	-4428.03	-4777.95	385.394	76.6174	242.032	313.636	TRUE	FALSE	intraplate
U-27	-136.027	49.5359	12.8188	<Null>	undefined	undefined	y	n	16	N/A	-3721.97	-3692.12	-3619.05	-3701.61	74.5501	5.79197	131.361	45.8209	TRUE	FALSE	intraplate
U-28	154.473	-3.36961	70.0577	<Null>	undefined	undefined	n	n	15	N/A	-2212.2	-1572.48	-1366.48	-2539.58	944.357	95.6181	1036.74	518.017	TRUE	FALSE	intraplate
U-29	-97.5131	-36.6462	79.1632	<Null>	undefined	undefined	n	n	15	N/A	-3393.22	-3385.06	-2977.84	-3540.09	336.097	67.6893	336.822	429.082	TRUE	FALSE	divergent
U-3	-35.4724	2.96188	4.31937	<Null>	undefined	undefined	n	n	4	N/A	-3739.42	-3690.84	-3682.56	-3780.66	60.257	6.08846	62.7622	64.0157	TRUE	FALSE	intraplate
U-30	161.336	7.64358	46.2281	<Null>	undefined	undefined	n	n	13	N/A	-4168.28	-3775.08	-3619.27	-4460.27	441.658	146.014	661.574	448.859	TRUE	FALSE	intraplate
U-31	-43.1878	-56.0008	95.0856	<Null>	undefined	undefined	n	n	13	N/A	-3556.14	-3175.08	-3076.91	-3449.97	560.773	117.309	316.425	476.942	TRUE	FALSE	intraplate
U-32	57.7679	-13.7728	54.5241	<Null>	undefined	undefined	n	n	11	N/A	-3593.11	-3863.67	-3100.89	-4097.34	464.919	113.68	678.893	197.199	TRUE	FALSE	intraplate
U-33	-95.0566	-58.6071	50.3477	<Null>	undefined	undefined	n	n	10	N/A	-3876.34	-2938.3	-2856.81	-4288.47	525.138	83.8519	782.054	292.66	TRUE	FALSE	intraplate
U-34	-13.5981	-16.9672	155.895	<Null>	undefined	undefined	n	n	10	N/A	-3438.56	-3122.98	-2836.86	-3130.28	424.909	88.8551	483.267	548.712	TRUE	FALSE	divergent
U-35	-127.316	42.8139	98.9278	<Null>	undefined	undefined	y	n	9	N/A	-3034.3	-3028.33	-2827.69	-2864.38	562.361	89.4394	236.859	271.408	TRUE	FALSE	divergent
U-36	-146.576	-10.819	12.1409	<Null>	undefined	undefined	n	n	9	N/A	-5237.28	-4890.8	-4876.55	-5303.81	390.106	10.2274	96.0182	432.564	TRUE	FALSE	intraplate
U-37	-126.541	-28.193	19.3376	<Null>	undefined	undefined	n	n	8	N/A	-3515	-3302.61	-3275.36	-3704.38	182.719	52.9742	149.264	103.255	TRUE	FALSE	intraplate
U-38	-33.1929	32.1764	9.6785	<Null>	undefined	undefined	n	n	8	N/A	-3902.38	-3770.3	-3703.89	-4001.53	141.97	23.2316	187.929	160.318	TRUE	FALSE	intraplate
U-39	167.993	28.3996	35.352	<Null>	undefined	undefined	n	n	8	N/A	-5289.47	-4633.59	-4541.45	-5691.86	392.762	57.1964	602.032	201.899	TRUE	FALSE	intraplate
U-4	-11.4523	-38.2768	7.22531	<Null>	undefined	undefined	n	n	4	N/A	-3495.25	-3482.44	-3461.92	-3512.12	58.073	58.9491	107.592	107.146	TRUE	FALSE	intraplate
U-40	-178.663	18.7638	32.5269	<Null>	undefined	undefined	n	n	8	N/A	-3615.47	-3074.27	-3018.7	-3914.23	509.316	227.379	636.787	523.797	TRUE	FALSE	intraplate
U-41	-2.39312	-40.3397	49.8936	<Null>	undefined	undefined	n	n	8	N/A	-4562.47	-4410.78	-4324.56	-4627.36	115.899	12.7371	123.028	145.856	TRUE	FALSE	intraplate
U-42	12.8211	-49.5694	57.3931	<Null>	undefined	undefined	n	n	7	N/A	-4132.14	-3675.11	-3461.22	-4340.23	436.503	85.2698	330.056	381.467	TRUE	FALSE	intraplate
U-43	-17.0733	-37.6806	70.9708	<Null>	undefined	undefined	n	n	6	N/A	-2809.25	-2824.75	-2295.69	-3062.77	412.047	52.6851	378.348	445.361	TRUE	FALSE	divergent
U-44	-44.518	23.1544	43.8273	<Null>	undefined	undefined	n	n	6	N/A	-3137.39	-3090.41	-2770.31	-3519.2	270.183	144.266	337.011	265.536	TRUE	FALSE	divergent
U-45	-19.6714	-7.93135	11.4809	<Null>	undefined	undefined	n	n	6	N/A	-4693.94	-4613.56	-4610.53	-4747.25	40.926	14.0043	54.4274	47.162	TRUE	FALSE	intraplate
U-46	-27.746	7.19132	17.8597	<Null>	undefined	undefined	n	n	6	N/A	-4401.02	-4322.28	-4267.47	-4478.16	122.59	76.754	88.4869	161.412	TRUE	FALSE	intraplate
U-47	-128.16	26.2553	10.2838	<Null>	undefined	undefined	n	n	5	N/A	-4487.77	-4365.67	-4353.7	-4557.34	98.011	18.1358	127.058	55.2141	TRUE	FALSE	intraplate
U-48	50.3291	-41.5886	40.1929	<Null>	undefined	undefined	n	n	5	N/A	-3455.69	-3393.92	-3362.91	-3488	149.763	17.1695	108.464	158.971	TRUE	FALSE	intraplate
U-49	-114.613	-34.6157	9.62581	<Null>	undefined	undefined	n	n	5	N/A	-3411.59	-3381.91	-3358.67	-3399.89	39.3378	3.44474	32.7758	39.7858	TRUE	FALSE	intraplate
U-5	-114.168	-10.1723	6.899	<Null>	undefined	undefined	n	n	4	N/A	-3556.55	-3521.69	-3520.83	-3574.62	76.1341	3.00455	21.8486	85.6546	TRUE	FALSE	intraplate
U-50	65.6623	6.94077	18.2863	<Null>	undefined	undefined	n	n	5	N/A	-4485.88	-4269.03	-4267.56	-4632.61	82.796	68.5937	121.162	82.7305	TRUE	FALSE	intraplate
U-51	98.2037	-46.2912	9.21571	<Null>	undefined	undefined	n	n	5	N/A	-3266.09	-3230.36	-3221.11	-3294.23	50.9404	22.5675	34.8699	81.2019	TRUE	FALSE	intraplate
U-52	-91.1806	-48.7126	32.8719	<Null>	undefined	undefined	n	n	5	N/A	-4617.58	-4501.52	-4372.77	-4673.22	148.693	114.95	109.759	246.423	TRUE	FALSE	intraplate
U-53	14.0846	-50.9316	21.7345	<Null>	undefined	undefined	n	n	5	N/A	-3485.88	-3397.75	-3348.56	-3588.72	104.862	28.0218	93.1719	153.202	TRUE	FALSE	intraplate
U-54	-13.9167	-28.4773	8.4802	<Null>	undefined	undefined	n	n	5	N/A	-3393.08	-3351.56	-3323.08	-3469.53	158.082	18.6404	98.2785	241.445	TRUE	FALSE	intraplate
U-55	-145.165	53.5678	5.64378	<Null>	undefined	undefined	n	n	5	N/A	-4021.94	-3951.31	-3943.56	-4033.83	24.4009	5.77407	60.3458	24.3661	TRUE	FALSE	intraplate
U-56	89.6183	-51.8196	40.6082	<Null>	undefined	undefined	n	n	5	N/A	-4193.08	-4088.59	-4067.62	-4140.73	175.372	39.8465	174.819	107.55	TRUE	FALSE	intraplate
U-57	-173.036	-15.5477	38.4004	<Null>	undefined	undefined	y	n	5	N/A	-2046.78	-1615.03	-1446.25	-2394.88	664.552	79.3123	406.033	720.783	TRUE	FALSE	volcanic arc
U-58	-90.3336	1.26731	8.14125	<Null>	undefined	undefined	n	n	5	N/A	-1551.5	-1507.77	-1462.11	-1587.2	42.2149	21.0407	64.2532	40.142	TRUE	FALSE	divergent
U-59	69.6839	-17.3632	53.3407	<Null>	undefined	undefined	n	n	5	N/A	-4111.45	-4048.11	-3834.55	-4198.44	224.649	164.179	181.837	199.714	TRUE	FALSE	intraplate
U-6	-116.634	26.8493	5.59577	<Null>	undefined	undefined	n	n	4	N/A	-3370.55	-3274.38	-3253.58	-3422.31	104.763	17.5851	55.7925	137.557	TRUE	FALSE	intraplate
U-60	160.191	9.46674	12.3703	<Null>	undefined	undefined	n	n	4	N/A	-4971.23	-4823.64	-4811.61	-5062.81	101.951	14.5981	117.093	93.5957	TRUE	FALSE	intraplate
U-61	-111.677	17.1355	4.75526	<Null>	undefined	undefined	y	n	4	N/A	-3495.33	-3464	-3427.41	-3530.78	50.3715	0	50.1967	36.6966	TRUE	FALSE	intraplate
U-62	69.2752	-1.20513	54.8455	<Null>	undefined	undefined	n	n	4	N/A	-3606.12	-3650.34	-3432.03	-3536.62	246.659	56.9872	77.2862	316.095	TRUE	FALSE	intraplate
U-63	-2.84477	-59.9228	9.57701	<Null>	undefined	undefined	n	n	4	N/A	-5140	-5036.89	-5020.09	-5207.11	66.8581	21.6189	76.8079	85.0122	TRUE	FALSE	intraplate
U-64	-175.062	-32.4409	4.33181	<Null>	undefined	undefined	n	n	4	N/A	-5599.75	-5563.06	-5521.95	-5654.64	58.6449	14.37	61.9938	55.7588	TRUE	FALSE	intraplate
U-65	-29.7077	38.6815	9.77983	<Null>	undefined	undefined	n	n	4	N/A	-1883.33	-1821.58	-1817.56	-1937.94	97.8547	4.45745	64.3574	104.373	TRUE	FALSE	divergent
U-66	-44.1374	21.4534	27.9311	<Null>	undefined	undefined	n	n	4	N/A	-3843.28	-3605.55	-3527.67	-3924.53	417.433	34.0954	224.863	531.499	TRUE	FALSE	divergent
U-67	-17.0853	36.8014	11.1867	<Null>	undefined	undefined	n	n	4	N/A	-4896.23	-4804.22	-4799.48	-5009.28	133.278	12.944	151.313	108.972	TRUE	FALSE	intraplate
U-68	-122.921	-57.1517	51.2132	<Null>	undefined	undefined	n	n	4	N/A	-4237.3	-4158.14	-4132.25	-4234.75	105.42	14.6371	60.7569	131.518	TRUE	FALSE	intraplate
U-69	-4.16315	-14.3878	20.3925	<Null>	undefined	undefined	n	n	4	N/A	-4580.03	-4502.34	-4390.83	-4703.73	104.968	41.939	136.508	165.898	TRUE	FALSE	intraplate
U-7	146.052	17.8219	7.92907	<Null>	undefined	undefined	n	n	4	N/A	-2651.05	-2607.19	-2574.09	-2689.89	102.366	14.3939	62.5746	130.827	TRUE	FALSE	volcanic arc
U-70	-35.1009	57.8392	16.0944	<Null>	undefined	undefined	y	n	4	N/A	-2487.94	-2348.75	-2346.95	-2629.66	95.4893	15.0364	61.3044	173.76	TRUE	FALSE	intraplate
U-71	-174.278	-17.5743	44.0702	<Null>	undefined	undefined	n	n	4	N/A	-1214.55	-1095.2	-1094.36	-1601.77	292.845	107.058	384.367	600.871	TRUE	FALSE	volcanic arc
U-72	164.355	20.2683	5.59936	<Null>	undefined	undefined	n	n	4	N/A	-5354.52	-5323.77	-5315.08	-5405	87.2693	11.739	72.1458	68.1281	TRUE	FALSE	intraplate
U-73	-31.6592	2.41696	4.75127	<Null>	undefined	undefined	y	n	4	N/A	-2967.3	-2890.25	-2885.67	-2985.59	75.7037	31.5188	86.3861	77.2301	TRUE	FALSE	divergent
U-74	3.78856	-62.8406	8.53359	<Null>	undefined	undefined	n	n	4	N/A	-5322.41	-5345.41	-5282.48	-5336.3	19.0031	18.8495	24.6469	16.6045	TRUE	FALSE	intraplate
U-75	-82.3066	4.87006	13.0598	<Null>	undefined	undefined	y	n	3	N/A	-3740.16	-3685.19	-3683.36	-3745.69	88.8473	5.76323	82.3317	137.69	TRUE	FALSE	<Null>
U-76	166.771	-27.0003	9.38437	<Null>	undefined	undefined	n	n	3	N/A	-3385.11	-3317.2	-3305.58	-3387.2	76.3933	21.3879	75.9619	110.209	TRUE	FALSE	<Null>
U-77	159.088	-27.0408	7.03396	<Null>	undefined	undefined	n	n	3	N/A	-3304.45	-3249.94	-3249.91	-3337.12	58.4083	21.9003	65.6612	58.7998	TRUE	FALSE	<Null>
U-78	-168.432	0.637389	7.38206	<Null>	undefined	undefined	y	n	3	N/A	-5295.38	-5305.67	-5234.11	-5332.45	64.5783	10.3939	66.5353	67.765	TRUE	FALSE	<Null>
U-79	157.161	-20.9065	18.4087	<Null>	undefined	undefined	n	n	3	N/A	-1893.2	-1697.22	-1664.94	-2041.8	408.376	95.3583	530.027	216.053	TRUE	FALSE	<Null>
U-8	-132.897	41.2333	5.55233	<Null>	undefined	undefined	n	n	4	N/A	-3663.27	-3617.41	-3614.05	-3693.53	15.7602	6.70755	22.6918	28.2184	TRUE	FALSE	intraplate
U-80	-154.865	-6.88421	9.601	<Null>	undefined	undefined	n	n	3	N/A	-4964.3	-4781.92	-4773.58	-5060.78	95.3621	7.33422	179.086	94.9257	TRUE	FALSE	<Null>
U-81	141.857	7.93678	9.50417	<Null>	undefined	undefined	n	n	3	N/A	-3529.36	-3443.61	-3432.67	-3606.69	109.278	9.03399	75.0825	115.532	TRUE	FALSE	<Null>
U-82	143.873	-0.556565	12.3443	<Null>	undefined	undefined	n	n	3	N/A	-3306.59	-3223.02	-3210.34	-3411.5	84.8334	6.66964	89.8433	182.448	TRUE	FALSE	<Null>
U-83	-141.5	-10.7999	6.84209	<Null>	undefined	undefined	n	n	3	N/A	-4360.91	-4347.19	-4325.06	-4380.8	26.3342	1.35641	19.1147	36.1746	TRUE	FALSE	<Null>
U-84	-41.1552	31.1241	4.61944	<Null>	undefined	undefined	y	n	3	N/A	-2781.41	-2675.56	-2670.67	-2850.38	79.7335	8.55474	52.4738	112.485	TRUE	FALSE	<Null>
U-85	154.657	26.9417	4.61669	<Null>	undefined	undefined	n	n	3	N/A	-5976.02	-6001.91	-5941.84	-6009.64	42.5711	53.642	40.3668	37.6781	TRUE	FALSE	<Null>
U-86	-113.238	9.29013	7.98261	<Null>	undefined	undefined	y	n	3	N/A	-3615.98	-3540.53	-3503.52	-3704.98	111.827	95.6857	167.935	64.5931	TRUE	FALSE	<Null>
U-87	-103.43	15.0923	7.25995	<Null>	undefined	undefined	n	n	3	N/A	-3352.64	-3250.55	-3235.3	-3369.86	71.6069	53.9513	57.9546	96.7127	TRUE	FALSE	<Null>
U-88	-178.095	-14.7921	4.61033	<Null>	undefined	undefined	n	n	3	N/A	-1818.84	-1770.8	-1768.36	-1844.14	33.1645	14.3453	42.4446	23.6933	TRUE	FALSE	<Null>
U-89	-25.4684	42.5275	9.27909	<Null>	undefined	undefined	n	n	3	N/A	-3394.39	-3366.59	-3359.86	-3411.34	52.7798	16.439	74.0511	49.4827	TRUE	FALSE	<Null>
U-9	-166.668	13.0086	12.0151	<Null>	undefined	undefined	n	p	12	N/A	-4349.08	-4570.67	-4374.05	-4432.31	173.313	10.3864	128.562	225.381	TRUE	FALSE	intraplate
U-90	-120.168	-22.2907	24.0391	<Null>	undefined	undefined	n	n	3	N/A	-3462.25	-3410.69	-3379.92	-3518.69	31.3663	9.93553	41.3232	35.5052	TRUE	FALSE	<Null>
U-91	-24.0802	3.53253	39.2872	<Null>	undefined	undefined	n	n	3	N/A	-4413.45	-4483.66	-4281.16	-4438.45	131.753	10.1861	140.377	116.028	TRUE	FALSE	<Null>
U-92	2.75486	-55.0619	18.1917	<Null>	undefined	undefined	n	n	3	N/A	-3383.97	-3368.23	-3332.7	-3388.3	131.954	2.3234	61.1945	191.857	TRUE	FALSE	<Null>
U-93	-118.937	-29.1312	52.9058	<Null>	undefined	undefined	n	n	3	N/A	-3594.75	-3653.08	-3458.72	-3606.23	137.508	41.5577	183.695	167.612	TRUE	FALSE	<Null>
U-94	-153.391	-28.2501	30.3655	<Null>	undefined	undefined	y	n	3	N/A	-5207.11	-5069	-5043.36	-5169.72	177.346	25.1303	93.4655	158.761	TRUE	FALSE	<Null>
U-95	-173.558	-17.7822	20.1925	<Null>	undefined	undefined	n	n	3	N/A	-1390.28	-1299.38	-1274.89	-1466.88	157.565	20.3435	161.823	166.873	TRUE	FALSE	<Null>
U-96	51.8151	-46.4268	9.84067	<Null>	undefined	undefined	n	n	3	N/A	-96.5938	229.922	230.719	-162.766	352.18	34.3071	227.034	370.115	TRUE	FALSE	<Null>
U-97	-110.429	6.11314	22.1499	<Null>	undefined	undefined	n	n	3	N/A	-3607.3	-3579.48	-3490.66	-3701.75	356.571	37.6493	214.798	364.163	TRUE	FALSE	<Null>
U-98	14.8784	-64.0143	21.7897	<Null>	undefined	undefined	n	n	3	N/A	-5083.23	-5014.78	-5011.19	-5125.48	75.7582	38.311	98.2046	53.171	TRUE	FALSE	<Null>
U-99	-20.1627	46.1005	25.751	<Null>	undefined	undefined	n	n	3	N/A	-4433.48	-4384.72	-4300.16	-4621.2	134.76	24.8838	76.2818	179.631	TRUE	FALSE	<Null>
